# Supplementary material
Source: PubMed Central journal article supplement (PMC4321231)
Supplement: pnas.1421707112.sapp.pdf [file pnas.1421707112.sapp.pdf]

## Supporting Information (SI Appendix)

### Oldest known euarchontan tarsals and affinities of Paleocene *Purgatorius* to Primates

Stephen G. B. Chester<sup>a,b,\*</sup>, Jonathan I. Bloch<sup>c</sup>, Doug M. Boyer<sup>d</sup>, William A. Clemens<sup>e</sup>

<sup>a</sup>Department of Anthropology and Archaeology, Brooklyn College, City University of New York, 2900 Bedford Avenue, Brooklyn, NY, 11210.

<sup>b</sup>New York Consortium in Evolutionary Primatology, New York, NY, 10024.

<sup>c</sup>Florida Museum of Natural History, University of Florida, 1659 Museum Road, Gainesville, FL, 32611-7800.

<sup>d</sup>Department of Evolutionary Anthropology, Duke University, 104 Biological Sciences Building, Durham, NC, 27708-0383.

<sup>e</sup>University of California Museum of Paleontology, 1101 Valley Life Sciences Building, Berkeley, CA, 94720-4780.

Correspondence to: Stephen G. B. Chester. Email: [stephenchester@brooklyn.cuny.edu](mailto:stephenchester@brooklyn.cuny.edu)  
Department of Anthropology and Archaeology, Brooklyn College, City University of New York, Brooklyn, 2900 Bedford Avenue, NY, 11210. Telephone: 718-951-5000 x2685.

#### This PDF File Includes:

|                                                                                   |    |
|-----------------------------------------------------------------------------------|----|
| SI Materials and Methods                                                          | 2  |
| Institutional Abbreviations                                                       | 2  |
| Allocation of Isolated Tarsal Bones                                               | 2  |
| Regression Analysis                                                               | 3  |
| Principal Component Analysis                                                      | 5  |
| Phylogenetic Analysis                                                             | 8  |
| Geological setting and age of the Garbani Channel                                 | 13 |
| Geological Setting                                                                | 13 |
| Age                                                                               | 13 |
| Description and comparison of tarsals attributed to <i>Purgatorius</i>            | 17 |
| Description of astragali attributed to <i>Purgatorius</i>                         | 17 |
| Comparison of astragali attributed to <i>Purgatorius</i> and <i>Protungulatum</i> | 20 |
| Comparison of astragali of euarchontan mammals                                    | 21 |
| Description of calcanei attributed to <i>Purgatorius</i>                          | 24 |
| Comparison of calcanei attributed to <i>Purgatorius</i> and <i>Protungulatum</i>  | 26 |
| Comparison of calcanei of euarchontan mammals                                     | 27 |
| Supporting Information References                                                 | 30 |
| Figures S1-S5                                                                     | 37 |
| Tables S1-S10                                                                     | 48 |

## **SI Materials and Methods**

### Institutional Abbreviations

AMNH, American Museum of Natural History, New York, New York, U.S.A.; BAA, Biological Anthropology and Anatomy Collection at Duke University, Durham, North Carolina, U.S.A.; DPC, Duke Primate Center, Durham, North Carolina, U.S.A.; FMNH, Field Museum of Natural History, Chicago, Illinois, U.S.A.; HTB, Cleveland Museum of Natural History, Hamann-Todd Non-Human Primate Osteological Collection, Cleveland, Ohio, U.S.A.; LACM, Los Angeles County Museum of Natural History, Los Angeles, CA, U.S.A.; MNHN, Muséum Nationale d'Histoire Naturelle, Paris, France; NMB, Naturhistorisches Museum, Basel, Switzerland; SBU, Stony Brook University, Stony Brook, New York, U.S.A.; UALVP, University of Alberta Laboratory for Vertebrate Paleontology, Edmonton, Alberta, Canada; UCM, University of Colorado Museum, Boulder, Colorado, U.S.A.; UCMP, University of California Museum of Paleontology, Berkeley, California, U.S.A.; UF Mammalogy collection, Florida Museum of Natural History, University of Florida, Gainesville, FL, U.S.A.; UM, University of Michigan Museum of Paleontology, Ann Arbor, Michigan, U.S.A.; UNSM, University of Nebraska State Museum, Lincoln, Nebraska, U.S.A.; USNM, National Museum of Natural History, Smithsonian Institution, Washington D.C., U.S.A.; VPL/JU/NKIM, Vertebrate Paleontology Laboratory, University of Jammu, India, Naskal Intertrappean Mammal Catalogue Numbers; YPM, Yale Peabody Museum, New Haven, Connecticut, U.S.A.

### Allocation of Isolated Tarsal Bones

Thousands of vertebrate fossils from the Garbani Channel fauna localities, northwestern Montana, were examined at the UCMP. Several astragali and calcanei (Table S1) were identified

in unsorted miscellaneous bone boxes housed at the UCMP and are attributed to *Purgatorius* here. These specimens were originally collected at four different UCMP fossil localities (Table S1) where dental specimens of *Purgatorius* were previously collected and identified (Fig. S1). Specimens are confidently allocated to *Purgatorius* based on size (see regression analysis below), diagnostic euarchontan and plesiadapiform tarsal features (see descriptions and comparisons below), and the lack of dental remains of other euarchontans known from the Garbani Channel fauna.

### Regression Analysis

Regression analysis was used to evaluate the scaling relationship between the size of teeth and tarsals for euarchontan mammals, and to assess whether the tarsals attributed to *Purgatorius* are an appropriate size given the size of *Purgatorius* teeth known from the Garbani Channel fauna. Skeletal elements from a sample of 60 dentally-associated skeletons of euarchontans including extant euprimates, treeshrews, and colugos, and fossil plesiadapiforms, were microCT scanned at 4-36 microns using ScancoMedical scanners (uCT-40 and vivaCT-75 models) (see Table S2). All *Purgatorius* dental specimens were collected at UCMP locality V73080, a sublocality of the Garbani Quarry in the Garbani Channel fauna localities. Given that isolated first and second lower molars of *Purgatorius* can be difficult to differentiate, all *Purgatorius* specimens included in this study are lower jaw fragments with teeth so that tooth positions could be assessed with confidence (Table S3). Three-dimensional digital reconstructions of skeletal elements were created and measured using Avizo 6 software (<http://www.vsg3d.com/avizo>). Measurements include lower second molar (m2) maximum mesiodistal length (tL) and maximum buccolingual width (tW); astragalar lateral tibial facet

width (aW); and calcaneal cuboid facet dorsoplantar depth (cD) and mediolateral width (cW). See Table S2 for a specimen list and corresponding tooth and tarsal measurements.

We used the method of least squares to regress natural log of m2 area ( $tL*tW$ ) on natural log of astragalar lateral tibial facet width (aW), as well as natural log of m2 area ( $tL*tW$ ) on natural log of calcaneocuboid facet area ( $cW*cD$ ). Regressions were run on individuals, rather than species means. Such practice can create statistical problems if certain species are overrepresented compared to others. This is also true at the level of species means if certain clades are overrepresented and ultimately stems from interdependence of phylogenetically related data points (1). Of the 30 species in our sample, half are represented by a single specimen, whereas the species represented by the most specimens is represented by  $n=6$ . The taxa represented by the highest sample sizes are close to mean x-values of the regression, so they have less leverage to change the regression parameters than if they were on the extreme high or low end of the data range. We chose to use data on individuals (with dental and postcranial data from the same specimen) in order to incorporate information on scatter in the relationship between the two variables at the species level. Given our data structure, taking mean values would mainly serve to make the relationship appear cleaner than it is and lead to greater potential for type I error (the null hypothesis we tested is that the tarsals and dentition are from the same taxon).

Regressions were run in Microsoft Excel. 95% confidence limits on the prediction interval of tooth size from postcranial element dimensions were generated using equation 17.29 of (2). Prediction intervals that take into account the PSE of the data (the 'scatter') around the regression line are more appropriate than a confidence interval based on standard error in the regression parameters. Prediction intervals intuitively, are broad enough to incorporate most of

the data points used to construct the regression, whereas confidence intervals based on error in regression parameters typically exclude many more data points used to create the regression. Dimensions from isolated tarsals and teeth of *Purgatorius* from the Garbani Channel fauna localities (Table S3) were then plotted on the resulting regression equations. This served as a test of our attribution of tarsals to *Purgatorius* based on morphology alone. Our hypothesis of attribution would be refuted if *Purgatorius* tooth dimensions fell outside the 95% prediction intervals of other euarchontan tooth dimensions predicted by their respective tarsal dimensions. However, the teeth and corresponding measurements of tarsals attributed to *Purgatorius* fall comfortably within the 95% prediction intervals, suggesting that they have a scaling relationship that would be expected for a euarchontan mammal (Fig. S2).

### Principal Component Analysis

In order to evaluate our qualitative observations that the tarsals attributed to *Purgatorius* are generally similar to those of euarchontan mammals and specifically similar to those of plesiadapiforms, we ran Principal Component Analysis on a correlation matrix of linear and angular measurements. Additionally, we ran a cluster analysis also using the correlation matrix as our similar metric and using Paired Group Method for linking cases. Although the results of these two methods will not be independent, each method provides a slightly different perspective on the same phenetic dataset. All linear measurements were size-standardized using the geometric mean, and angular measurements are reported in degrees, but were analyzed in radians. Eighteen linear and five angular measurements of (3) were recorded for the astragalus (Fig. S3a) and 19 linear and six angular measurements of (4) were recorded for the calcaneus (Fig. S3b). The astragalus dataset of (3) was expanded to 48 individuals representing 34 species (Table S4). The calcaneus dataset of (4) was expanded to 54 individuals representing 33 species

(Table S5). The expanded taxonomic sample includes *Purgatorius*, other plesiadapiforms, other Puercan mammals (arctocyonid condylarth *Protungulatum* and cimolestid *Procerberus*), the Cretaceous adapisoriculid *Deccanolestes*, fossil and extant euprimates, extant treeshrews (*Ptilocercus* and *Tupaia*), and the extant dermopteran *Cynocephalus* (Tables S4, S5). Two of the seven astragali attributed to *Purgatorius* (UCMP 197507, 197509) are complete enough to record all 23 measurements. One of the nine calcanei attributed to *Purgatorius* (UCMP 197517) is complete enough to record all 25 measurements. As for the regression analysis above, all tarsals were microCT scanned and digital reconstructions were created and measured using Avizo 6 software.

Principal component analysis and cluster analysis were run using PAST v. 2.16 (5). Eigenvalue, percentage variance, and variable component loadings were recorded for each principal component (Tables S6, S7). If *Purgatorius* is not a primate, or the tarsals were incorrectly attributed to *Purgatorius*, then *Purgatorius* should not plot within primate (plesiadapiform or euprimate) morphospace. Furthermore, cluster analysis should support primates as the nearest morphological neighbors of *Purgatorius*. It should be noted that the minimum spanning tree of these datasets is also displayed, but this is not equivalent to the cluster analysis result as the algorithm for linking data points based on multivariate distances is different and can leave specimens widely disconnected from clusters to which they are actually fairly similar.

Results of principal component analysis include astragali attributed to *Purgatorius* plotting within plesiadapiform morphospace, which is distinctly separated from Puercan mammals *Protungulatum* and *Procerberus*, euprimates, treeshrews, and colugos (Fig. 4). Two species of the Cretaceous adapisoriculid *Deccanolestes* plot close to each other and near

pleiadapiform morphospace. *Deccanolestes* is not supported in Euarchonta by the phylogenetic analysis in this study (Fig. 2, S4a). Principal component 1 (PC1) represents 26.2% of the variance. It is most strongly correlated with variables 12 (flexor fibularis groove width), 20 (angle between fibular facet and lateral tibial facet), and 1 (maximum proximodistal length). Generally, an astragalus with a high PC1 score has a narrow flexor fibularis groove, a smaller angle between the fibular facet and lateral tibial facet, and a longer proximodistal length. Low PC1 scores generally represent the opposite conditions. PC2 represents 13.7% of the variance. It is most strongly correlated with variables 7 (lateral tibial facet maximum mediolateral width), 3 (head and neck proximodistal length), and 22 (angle between ectal facet and fibular facet). Generally, an astragalus with a high PC2 score has a relatively narrow lateral tibial facet, a longer head and neck, and a smaller angle between the ectal facet and fibular facet. Low PC2 scores generally represent the opposite conditions.

Cluster analysis shows the two astragali attributed to *Purgatorius* (UCMP 197507, 197509) to be nearest neighbors, and micromomyid plesiadapiforms *Dryomomys* (UM 41870) and *Tinimomys* (USNM 461201) are the successive nearest neighbors to this group. Results support *Purgatorius* as a plesiadapiform, and may reflect the primitive nature of this Puercan mammal, which, like *Procerberus* and *Deccanolestes*, has tarsal features such as a wide groove for the tendon of flexor fibularis on the astragalus.

Results of principal component analysis include calcanei attributed to *Purgatorius* plotting within plesiadapiform morphospace, which is distinct from that of other mammals. Puercan mammals *Protungulatum* and *Procerberus*, and Cretaceous adapisoriculid *Deccanolestes* plot close to plesiadapiform morphospace (Fig. 4). PC1 represents 36% of the variance. It is most strongly correlated with variables 15 (proximodistal length from peroneal

tubercle lateral apex to distal end of calcaneus), 19 (distance from proximal margin of peroneal tubercle to distal end of calcaneus), 11 (proximodistal length from sustentaculum medial apex to distal end of calcaneus), and 3 (distal calcaneal length). Generally, a calcaneus with a high PC1 score is elongated distally with a peroneal tuberosity and sustentaculum tali are situated fairly proximally. Low PC1 scores generally represent the opposite conditions. PC2 represents 12.1% of the variance. It is most strongly correlated with variables 6 (proximal end of tuber mediolateral width), 7 (ectal facet proximodistal length), and 8 (length of arc of ectal facet). Generally, a calcaneus with a high PC2 score has a tuber with a narrow proximal end and a longer ectal facet. Low PC2 scores generally represent the opposite conditions. Cluster analysis shows the paromomyid plesiadapiform *Ignacius* (USNM 442240) to be the nearest neighbor of the calcaneus attributed to *Purgatorius* (UCMP 197517). Results support *Purgatorius* as a plesiadapiform, and may reflect the primitive nature of this Puercan mammal, which, like *Procerberus* and *Deccanolestes*, has tarsal features such as a large peroneal tubercle on the calcaneus.

### Phylogenetic Analysis

The first character matrix analyzed was modified from that of (6), which was derived from previous analyses (7, 8). Previous results of all three of these analyses did not support *Purgatorius* as a primate or even as a placental mammal (6-8). The character matrix of (6) consists of 415 characters and 80 taxa. Five euarchontan taxa were added to this matrix including micromomyid plesiadapiforms *Foxomomys fremdi*, *Dryomomys szalayi*, and *Tinimomys graybulliensis*; a carpolestid plesiadapiform, *Carpolestes simpsoni*; and an extant dermopteran, *Cynocephalus volans*. Previous codings of euarchontans and other mammals were modified



based on new observations or recently published findings, with all new codings in bold (Table S8). Specimens used for coding characters in all phylogenetic analyses presented in this study are listed below. References used for coding characters in all phylogenetic analyses presented in this study are cited following each respective taxon below.

New Taxa:

*Foxomomys fremdi* (9, 10) UALVP 21010, 21011, 21012, 21013, 21014, 21015 (dentition)

*Dryomomys szalayi* (10, 11) UM 41870 (dentition, crania, postcrania)

*Tinimomys graybulliensis* (10, 12) USNM 461201(dentition, postcrania), 461202 (dentition, crania, postcrania)

*Carpolestes simpsoni* (13-15) UM 82670 (dentition, crania); UM 82688 (dentition, crania); UM 85177 (dentition, crania); UM 86273 (dentition, crania); UM 101923 (dentition, crania); UM 101963 (dentition, crania, postcrania); USNM 482354 (dentition, crania)

*Cynocephalus volans*—FMNH 56442 (dentition, crania, postcrania); UF 3290 (dentition, crania)

Additions or Modifications to Taxa:

*Purgatorius* (16-18) LACM 28128; UCMP 107406; 129266 (dentition); see Table S1 for new tarsal specimen numbers (postcrania)

*Plesiadapis* (19)

*Notharctus*—AMNH[FM] 11473 (dentition, crania, postcrania); AMNH[FM] 11474 (dentition, crania, postcrania); AMNH[FM] 11721 (postcrania); AMNH[FM] 13024 (postcrania); AMNH[FM] 127167 (dentition, crania, postcrania)

*Ptilocercus lowii* (20)

*Protungulatum* (16, 21, anterior dentition was previously coded based on a reconstruction in 22)

UCMP 105007, 112111 (cast: dentition)

*Oxyprimus*—YPM-PU 16704, 16866 (dentition)

Parsimony analysis was conducted using TNT (v1.1), software subsidized by the Willi Hennig Society (23), with all multistate characters treated as unordered. *Nanolestes* was designated as the outgroup, which results in the same topology as following the methods of (6) where the “Force” command was used to make four taxa (*Nanolestes*, *Peramus*, *Vincelestes*, and *Kielantherium*) consecutive outgroups. New Technology Search was used to obtain the stabilized consensus five times [135 Most Parsimonious Trees (MPTs) with a length of 2,662 steps]. Resulting MPTs were then used as starting trees and a Traditional Heuristic Search was carried out using TBR (3560 MPTs found). All resulting MPTs were used to obtain a strict consensus, and like initial results of (6), the resulting strict consensus tree was poorly resolved. The Pruned Trees function was then used to identify the least stable taxa (*Kharmerungulatum*, *Montanolestes*, and *Lainodon*), which were also the least stable taxa in the previous analysis of (6). Once removed using the Prune Taxa function, fifteen nodes were gained, leading to a considerably more resolved strict consensus tree (CI = 0.229, RI = 0.557)(Fig. S4a). The Tree Filter function was used to delete longer trees and duplicate MPTs, resulting in 1,120 MPTs retained with a length of 2,651 steps.

Bremer decay analysis was then conducted in TNT to assess branch support for the resulting strict consensus cladogram. Generally following the methods of (6), Bremer branch supports were calculated using the Traditional Search option (10 replicates per run with TBR enforced) from 50,000 suboptimal trees up to 10 steps longer than the most parsimonious tree.

Suboptimal trees were found by increasing the suboptimal option by one step for each heuristic search of 5,000 trees to avoid overestimated support values (23). Absolute Bremer support values were calculated once 50,000 suboptimal trees were found (see Fig. S4a). Also following the methods of (6), the three least stable taxa (*Kharmerungulatum*, *Montanalestes*, and *Lainodon*) were removed before branch support was calculated.

The second character matrix analyzed was modified from a matrix that was designed to evaluate relationships within Euarchonta (11). The original matrix of (11) was run in TNT following the same methods described above (except characters 55, 62, 71, and 74 are ordered) and the same resulting tree topology of (11) was obtained. The modified matrix of 173 characters and 20 taxa incorporates new *Purgatorius* tarsal data, with new codings in bold (Table S9). New Technology Search was used to obtain the stabilized consensus five times (2 MPTs with a length of 472 steps) and subsequent traditional heuristic search found one most parsimonious cladogram with the same tree topology as the original analysis conducted in PAUP (11) (CI = 0.477, RI = 0.598). Bremer decay analysis was then conducted in TNT following the same methods described above (see Fig. S4b).

The third character matrix analyzed was modified from a matrix that includes many taxa within Euarchontoglires (24). The original matrix of (24) was run in TNT following the same methods described above and the same resulting strict consensus tree topology of (24) was obtained. The modified matrix of 240 characters and 34 taxa incorporates 15 new codings of *Purgatorius* tarsal characters, with new codings in bold (Table S10). New Technology Search was used to obtain the stabilized consensus five times (3 MPTs with a length of 1,091 steps) and subsequent traditional heuristic search found two most parsimonious cladograms (CI = 0.296, RI = 0.522). Again, the strict consensus of two trees resulted in the same tree topology as the

original analysis (24). Bremer decay analysis was then conducted in TNT following the same methods described above (see Fig. S4c).

The three independent phylogenetic analyses conducted in this study support Sundatheria (Dermoptera + Scandentia) as the sister group to Primates, which includes *Purgatorius* and other plesiadapiforms (Fig. S4). These results differ from those of a recent cladistic analysis designed to evaluate the phylogenetic position of Eocene euprimate *Archicebus achilles* among euprimates and other euarchontan mammals (25). This character data matrix was updated from previous matrices that either included *Purgatorius* as an outgroup taxon (26) or supported *Purgatorius* as the sole member of stem Sundatheria (27). Results of (25) support *Purgatorius* and other plesiadapiforms as members of stem Primatomorpha. More specifically, these results support a stem primatomorph clade including *Purgatorius* and representatives of additional families of plesiadapiforms (Palaechthonidae, Microsyopidae, Micromomyidae, Paromomyidae, Plesiadapidae, Saxonellidae, Carpolestidae) with *Mixodectes* (Mixodectidae) as the basal-most member of this group (25). Results of this analysis also support Euprimates as the sister group to a clade consisting of extant dermopterans, additional members of Microsyopidae and Mixodectidae (suggesting these two groups are polyphyletic), as well as Plagiomenidae (which likely is not at all closely related to Dermoptera; 28). As was the case for *Purgatorius*, postcrania have not been described for palaechthonids, microsyopids, and plagiomenids, and the discovery and analysis of such fossils should continue to improve our understanding of primate origins and supraordinal relationships.

## **Geological setting and age of the Garbani Channel**

### Geological setting

The Garbani Channel is part of the Tullock Formation in Garfield County, northeastern Montana (Fig. S1a, b). In many recent paleontological and geological studies of this area the Tullock is recognized as a formation, but currently the United States Geological Survey classifies the Tullock as a member of the Fort Union Formation. The difference is largely nomenclatorial.

The main Garbani Quarry is in deposits filling the Garbani Channel exposed on the ridge that separates the valleys of an unnamed tributary to the headwaters of Hell Creek and the next tributary to the east, Cottonwood Creek (Fig. S1b) (29). The fossil tarsals described and analyzed in Figures 1 and 3 (UCMP 197509 and 197517) were found in one of the sub-localities of the main Garbani Quarry, UCMP locality V99438. Additional astragali and calcanei attributed to *Purgatorius* were found in UCMP locality V72128, another sub-locality within the main Garbani Quarry, and UCMP localities V74122 and V75194 (see Table S1). The latter two localities are in fillings of the Garbani Channel exposed in Cottonwood Creek approximately 1.5 miles (ca. 2.4 km) southeast of the main Garbani Quarry. All the localities are in T 20 N, R 36-37 E (29). Precise locality information is available to qualified researchers from the University of California Museum of Paleontology. The fossiliferous sediments from these localities were hand-quarried and then processed by underwater screening. The resulting concentrates were sorted with microscopes providing approximately ten times magnification.

### Age

Geological and paleontological research in the valleys of Hell Creek and Snow Creek began in 1902 and continued intermittently, particularly from the 1960s to the present and is

ongoing (30). The Tullock Formation is distinguished from the underlying Hell Creek Formation by lithostratigraphic zones characterized by the presence of numerous beds of lignites grading into carbon-rich siltstones. Collier and Knechtel (1939) established a pattern of alphabetical designation for these lignite-rich zones, which they named Coals (Fig. S1d) (31). They clearly noted that these Coals were not regionally continuous beds but lithostratigraphic zones characterized by deposition of lenticular beds of lignite. Subsequent research (e.g., 29, 32) has fully supported this interpretation.

In the early 1960s it was recognized that many of the lignites contained tephra, sanidine-bearing silicic volcanic ashes suitable for radioisotopic age determinations (e.g., 33). Later Swisher et al. (1993) published the results of their radioisotopic age determinations and the magnetostratigraphy of a composite section based on outcrops in the headwaters of Snow, Hell, and Cottonwood creeks (34). Building on the research of Renne et al. (2013) (35), Sprain et al. (2014) (32) reported more, higher resolution radioisotopic age determinations and incorporated previous magnetostratigraphic analyses of the composite section (34, 36, 37). Figure S1d documents the results of some of this research in Snow, Hell, and Cottonwood creeks, part of Sprain et al.'s (2014) "Western Area" of research (32).

In this area, the Garbani Channel was cut through the X Coal to, but apparently not through, the underlying Y Coal (Fig. S1d). Sediments forming the Garbani Channel filling, which are at least 80 feet (24.4 m) thick, are overlain by approximately 23 feet (ca. 7 m) of mudstones, siltstones and sandstones that, in turn, are capped by the W Coal (29, p. 28, Section S13). Sprain et al. (2014) report age determinations of 65.667 Ma and 65.741 Ma from tephra in two lignites within the Y Coal complex exposed in the immediate vicinity of the Garbani Quarry (Fig. S1d, Western Area) (32). The younger age determination sets a maximum age of the

Garbani Channel filling at approximately 400 Ka after the Cretaceous-Paleogene (K-Pg) boundary. An age determination from a tephra within the W Coal is 65.118 Ma, or approximately 925 Ka after the K-Pg boundary. Sprain et al. (2014) found a sediment accumulation rate of 5 to 10 cm/Ka above the HFZ in the composite section (32). Applying this rate, the ca. 7 m of sediment separating the top of the Garbani Channel filling from the base of the W Coal represents approximately 70 to 140 Ka. Using an approximate mid-value of 100 Ka the age of the top of the Garbani Channel would be on the order of 65.2 Ma or approximately 840 Ka after the K-Pg. Unfortunately a tephra suitable for radiometric age determination has yet to be found in the X Coal in the composite section. The reported age determination of a tephra in an X Coal is from a tephra found in a coal in exposed in the valley of McGuire Creek some 60 km to the east (32, Fig. 2, Eastern Area). Stressing the approximations in these calculations; the assumption that the Garbani Channel filling represents a single episode of cutting and filling, not a multistoried event; and time averaging of the vertebrate fossils was not significant, a working hypothesis that the fossils representing the Garbani Channel local faunas document vertebrates that lived between approximately 400 and 840 Ka after the K-Pg is warranted. The Garbani Channel cuts the local X Coal and reaches the younger Y Coal, which suggests the time of its cutting and filling was closer to the higher, more recent, end of this range.

Currently the Puercan North American Land Mammal Age (NALMA) is subdivided into three interval zones. Local faunas, including the Hells Hollow local fauna (Fig. S1d), preserved in sediments of the Tullock Formation deposited during magnetostratigraphic Chron C29r have been referred to the oldest interval zone of the Puercan (Pu1) (29, 38). The localities yielding these local faunas are stratigraphically below the HFZ Coal, which was also deposited during

Chron C29r. Vertebrate fossils from the interval between the HFZ and Y Coals have yet to be discovered and described.

The interval zones Puercan 2 (Pu2) and Puercan 3 (Pu3) are typified on local faunas from the San Juan Basin, New Mexico, found in deposits formed during Chron C29n. The Garbani Channel filling was deposited during Chron C29n. Lofgren et al. (2004) accurately noted that the taxonomic composition of the Garbani Channel local faunas had yet to be fully analyzed (38). They tentatively suggested its biostratigraphic correlation with Pu3 faunas of the San Juan Basin and the Hanna Basin, Wyoming, primarily on the co-occurrence of species of the genus *Taeniolabis*. In the latter two areas *Taeniolabis* is represented by *T. taoensis*. In her study of records of *Taeniolabis* from the Garbani Channel, based on a sample of seven isolated teeth, Simmons (1987) recognized two other species *Taeniolabis*, *T. lamberti* and *T. sp.* Teeth of *T. sp.* differ from those of *T. taoensis* in morphological details (39). The biostratigraphic significance of the occurrence of two species of *Taeniolabis* (*T. lamberti* and *T. sp.*) in the Garbani Channel local fauna in refined correlations remains to be determined. Subsequent analyses of other members of the Garbani Channel local fauna (e.g., 40, 41 and references therein), add support to the proposed temporal correlation with Pu3 local faunas of the San Juan Basin.

In summary, the tarsal elements attributed to *Purgatorius* that are described and analyzed here were derived from individuals that lived between approximately 400 ka and 800 ka after the K-Pg boundary. They were members of the Garbani Channel local fauna that probably is referable to the Pu3 interval zone. Analyses of the taxonomic composition of this local fauna indicate it differs somewhat from Pu3 local faunas in the Hanna and San Juan Basins. A working hypothesis that these differences primarily reflect biogeographic differentiation and not significant difference in age is favored but requires further investigation.



## **Description and comparison of tarsals attributed to *Purgatorius***

### Description of astragali attributed to *Purgatorius*

Seven astragali are attributed to *Purgatorius* (Table S1), and there is a considerable amount of morphological variability present in this sample. This variation includes the degree of robusticity of the astragalar body and the length of the astragalar neck, as illustrated by the two most complete specimens (UCMP 197507, 197509; Fig. S2a). Despite such variability, there are no distinctive qualitative or quantitative differences in one or more specimens with respect to the remainder, leading to the conservative working hypothesis that all of these bones represent a single species. The description of astragali attributed to *Purgatorius* below is based on UCMP 197507 and UCMP 197509 unless otherwise noted. These two specimens are good representative end-members of the observed range of variation documented in this sample.

The astragali attributed to *Purgatorius* have a body that is fairly broad relative to its proximodistal length, a neck that is short, and a head that is mediolaterally broad and oval in distal view (Fig. 1). The dorsal surface of the astragalar trochlea (lateral tibial facet) is shallowly grooved and has lateral and medial trochlear crests that are low, yet clearly defined. The lateral trochlear crest is sharper and slightly taller than the medial trochlear crest. This relates to the considerably greater dorsoventral depth of the fibular facet compared to that of the medial tibial facet. The mediolateral width of the lateral tibial facet is fairly consistent from the proximal to distal margins of this facet. The defined crests of the trochlea (especially the lateral trochlear crest that delimits the lateral tibial facet from the fibular facet) would constrain the upper ankle joint to a fairly hinge-like movement. These limitations would reduce the amount of inversion that could occur at the upper ankle joint of *Purgatorius*.

In dorsal view, from the proximal side of the astragalus, the lateral tibial facet curves slightly distolaterally and then distomedially before extending slightly onto the dorsal surface of the astragalar neck. The lateral arc of the trochlear crests suggests conjunct pedal abduction during dorsiflexion, and adduction during plantarflexion. In taxa such as modern lemuriforms, such morphology has been associated with the use of small diameter supports and or vertical supports (42). The extension of the lateral tibial facet onto the neck (squatting facet) is a reflection of a habitually, strongly dorsiflexed foot that is also typical of taxa that cling to vertical supports (43). The astragalar neck and head are angled approximately 30 degrees distomedially relative to the plane of the lateral tibial facet. The lateral tibial facet extends proximally to the medial aspect of the groove for the tendon of M. flexor fibularis. This groove is large and wide mediolaterally, extending far laterally from the medial margin of the bone. No superior astragalar foramen is present in the more complete specimens attributed to *Purgatorius*, although a small foramen is present in a few specimens (e.g., UCMP 197486), suggesting that this feature is variably either small or absent. Therefore, tissues from the superior astragalar foramen probably would not have limited movement of the tibia proximally (i.e. as in extreme plantarflexion). Nevertheless, extreme plantarflexion was probably infrequent since the lateral tibial facet mainly extends medially on the posterior end of the body.

Astragali attributed to *Purgatorius* have a fibular facet that is convex and slopes slightly laterally, creating a somewhat obtuse angle between the fibular facet and lateral tibial facet. A depression is located posterior and plantar to the fibular facet for attachment of the astragalofibular ligament. The medial tibial facet is vertical dorsoventrally for approximately half of its depth before sloping medioplantarly on the proximal end. The medial tibial facet is clearly separated from the lateral tibial facet by a well-defined medial trochlear crest.

On the plantar surface, the considerably wide groove for the tendon of *M. flexor fibularis* is bound medially by the plantar margin of the medial tibial facet and laterally by the proximal margin of the ectal facet. The ectal facet approximates in size or is slightly larger than the groove for the tendon of *M. flexor fibularis*. The ectal facet is saddle-shaped, wider than long, and obliquely oriented relative to the long axis of the astragalus. It is shorter than the corresponding ectal facet on the calcanei, which would allow the astragalus to rotate on the calcaneus at the lower ankle joint. The astragalar ectal facet is bound laterally by the plantar margin of the fibular facet. An inferior astragalar foramen is present at the midline of the base of a well-marked interosseous sulcus for the attachment of the ligament between the astragalus and calcaneus. This sulcus separates the ectal and sustentacular facets. Laterally, there is no obvious ribbon-like extension of the sustentacular facet proximally towards the groove of the *M. flexor fibularis*. Instead, this area appears non-articular. The sustentacular facet is slightly convex and becomes mediolaterally wider as it continues mediodistally before connecting to the navicular facet distally and spring ligament posteromedially. Despite continuity of articular surfaces for calcaneal sustentaculum, navicular and spring ligament, there is a slight groove marking the distal margin of the sustentacular facet.

In distal view, the astragalar head is oval shaped, being about twice as wide mediolaterally as deep dorsoventrally. The medial and lateral sides of the head are similar in height and extend slightly dorsally and proximally creating a reniform appearance of the head in distal view. On the pronounced medial side of the head, the navicular facet is rounded, reflecting a good range for inversion and eversion at the transverse tarsal joint. The fairly large contact between the navicular and astragalus may have also allowed greater capability for dorsiflexion and adduction of an inverted pes (43).

### Comparison of astragali attributed to *Purgatorius* and *Protungulatum*

Partially following characteristics outlined by (44), the astragali of *Purgatorius*, like those of the more recent and derived plesiadapiform *Plesiadapis*, differ from those attributed to *Protungulatum* (as well as the tarsals of other described Puercan mammal astragali) in several ways (Fig. S5). *Protungulatum* is considerably larger than *Purgatorius*. The lateral tibial facet of *Purgatorius* is similar to that of other plesiadapiforms in being relatively longer proximodistally than that of *Protungulatum*. More specifically, the lateral tibial facet of *Purgatorius* represents approximately two-thirds of the entire astragalar length, whereas this facet represents closer to one half of the astragalar length of *Protungulatum*. This would have allowed a greater degree of dorsi- and plantarflexion in the upper ankle joint of *Purgatorius*. In distal view it is apparent that the astragalar body of *Purgatorius* is relatively higher dorsoventrally than that of *Protungulatum*. This is especially true on the lateral side, in which the lateral trochlear crest is positioned higher dorsally than the medial trochlear crest, creating a more medially sloping lateral tibial facet in *Purgatorius*. The superior astragalar foramen is commonly absent or small when present in *Purgatorius*, whereas a large foramen is present in *Protungulatum*.

On the plantar surface of the astragalus, *Purgatorius* has considerable continuity between the sustentacular and navicular facets. This continuity is also characteristic of other euarchontan mammals but is generally lacking in *Protungulatum*, which has distinctly separated facets. This continuity allows a great deal of mobility between the astragalus and calcaneus of *Purgatorius* and helps facilitate inversion of the foot, whereas *Protungulatum* had a more restricted lower ankle joint. Most apparent in distal view, the medial side of the astragalar head of *Purgatorius* is just as prominent as the lateral side, whereas the medial side of the astragalar head of *Protungulatum* is not nearly as developed as the lateral side (44). This suggests that the medial

side of the head was stressed more frequently for greater degrees of inversion than that of *Protungulatum*, which was probably a terrestrial plantigrade quadruped better suited for level oriented foot positions and for eversion on a fairly flat substrate (44). The astragalar head is oriented distomedially in *Purgatorius* whereas it is oriented more distolaterally in *Protungulatum*.

#### Comparison of astragali of euarchontan mammals

The astragali of euarchontan mammals are generally more similar to those attributed to *Purgatorius* than to those of terrestrial taxa such as *Protungulatum* (Fig. S5). Similarities include a lateral tibial facet that is long and extends at least slightly onto the neck, sustentacular and navicular facets that are confluent, and an astragalar head with a more pronounced medial side. Overall, the astragali attributed to *Purgatorius* are most similar to those of other plesiadapiforms in having features such as a lateral tibial facet that is medially sloping, a neck that is short, and a head that is ovoid. Euarchontan comparisons outside Primates are currently limited to extant treeshrews and colugos given the paucity of fossils representing these clades. These extant taxa exhibit autapomorphies in their tarsus, which is not surprising given estimates of more than ~60-70 million years of independent evolution since diverging from other euarchontan mammals (e.g., 45).

The medially sloping lateral tibial facet found in many plesiadapiforms, such as paromomyids and plesiadapids, relates to having a relatively taller fibular facet than medial tibial facet. This pronounced condition is unique to plesiadapiforms among euarchontans, although it should be noted that the lateral side of the lateral tibial facet is slightly taller than the medial side of the astragalus of treeshrews such as *Ptilocercus*. The pronounced medially sloping trochlea of

plesiadapiforms may have reduced the potential for lateral shear of the tibia on the astragalus when using inverted foot postures during locomotion on large-diameter supports (46). Among plesiadapiforms, the medial slope of the trochlea is less pronounced in micromomyid astragali and those attributed to *Purgatorius*, partly due to the presence of a relatively taller and more distinct medial trochlear crest. A possibly related feature in *Purgatorius* and micromomyids is a slightly deeper astragalar trochlea compared to that of most other plesiadapiforms, *Ptilocercus*, and colugos. The more pronounced medial trochlear crest in *Purgatorius* and micromomyids delineates the medial and lateral tibial facets posteriorly in these taxa (47), which would reduce the capacity for inversion at the upper ankle joint. The higher medial trochlear crest also probably served to decrease the degree of static inversion present during neutral, or closest packed-configurations of the bones. In contrast for example, taxa with a more globular astragalar body, such as *Carpolestes simpsoni*, likely had a greater capacity for mobility beyond plantar- and dorsiflexion at the upper ankle joint compared to other plesiadapiforms (48). Relatively less static inversion at the upper ankle joint in *Purgatorius* and micromomyids may relate in part to body size. These taxa are small among plesiadapiforms for which postcrania are known, and unlike larger plesiadapiforms, their hind limbs would span a smaller arc when climbing a tree trunk of a given diameter.

Astragalar medial trochlear ridge height and trochlear depth are not as pronounced in *Purgatorius* and micromomyids as in euprimates such as the fossil adapoid *Notharctus*. However, these features are more pronounced in *Purgatorius* and micromomyids than in less basal plesiadapiforms, suggesting that the more extreme medial slope of some plesiadapids and paromomyids is derived. These more extreme astragalar features among more derived plesiadapiforms, such as *Plesiadapis*, have been previously cited as characteristics that

differentiate plesiadapiforms from euprimates (49). *Purgatorius* and micromomyids are more similar to euprimates than treeshrews and colugos in having a lateral tibial facet that is approximately the same mediolateral width from its proximal to distal margins (47), whereas the lateral tibial facet of other plesiadapiforms, such as paromomyids and plesiadapids, is wider distally.

The fibular facet of *Purgatorius* and micromomyids slopes slightly laterally, whereas other plesiadapiforms have a more dorsoventrally vertical fibular facet that forms an approximate right angle with the lateral tibial facet. The more obtuse angle between the fibular facet and lateral tibial facet in *Purgatorius* is somewhat similar to strepsirrhine euprimates, although *Purgatorius* has a convex fibular facet and this facet is concave dorsoplantarly in fossil strepsirrhines (50).

The plantar aspect of the astragalus of *Purgatorius* is generally similar to that of other plesiadapiforms. *Purgatorius* is most like micromomyids in having a groove for flexor fibularis that is large and very mediolaterally wide. This condition is likely primitive, as plesiadapiforms generally have a wider groove for flexor fibularis than euprimates, and *Purgatorius* and micromomyids have an equal or wider groove than more derived plesiadapiforms. This wide astragalar groove for the tendon of flexor fibularis is likely associated with correspondingly large areas for origination of M. flexor tibialis and M. flexor fibularis on the tibia and fibula, respectively, as documented in micromomyids (48). *Purgatorius* and other primates further differ from tupaiids in lacking the ventral projection of the proximomedial aspect of the astragalar body associated with this groove, and further differ from dermopterans in lacking a medially buttressed sulcus astragali that closely approaches this groove.

The head of astragali attributed to *Purgatorius* is much like that of other plesiadapiforms in being about twice as wide as deep, and in having a central depression on the dorsal surface, which makes the head appear reniform in distal view. It is also fairly similar to *Ptilocercus* in these ways, whereas dermopterans and euprimates generally have a more spherical astragalar head. Overall, the astragali of *Purgatorius* are most like those of micromomyid plesiadapiforms, which is in accord with the fact that these taxa have very similar dentitions (9, 10, 51), and are supported as among the most basal primates (Fig. S4b, c).

#### Description of calcanei attributed to *Purgatorius*

Nine isolated calcanei were attributed to *Purgatorius* (Table S1). One of these specimens is virtually complete (UCMP 197517)(Fig. 1), another is missing the proximal portion of the tuber (UCMP 197515)(Fig. S2b), and the remaining specimens are missing at least the peroneal tubercle (although the position and approximate size of this structure can usually be assessed based on the break on the lateral side of the bone). These calcanei articulate well with the astragali attributed to *Purgatorius* above.

Approximately two-thirds of the calcaneal length consists of the calcaneal tuber and ectal facet, so the calcaneus is rather short distal to the ectal facet (Fig. 1). The short neck of astragali attributed to *Purgatorius* also suggests that the tarsus of *Purgatorius* was not elongate. The calcaneal tuber is fairly deep dorsoventrally. In proximal view, the proximal end of the tuber is ovoid in shape and slightly deeper than mediolaterally wide, although two specimens have tubers with proximal ends more circular in outline (UCMP 197517, 153027). The tuber is wider at the proximal end than directly distal to it. The ectal facet is knuckle-shaped, oriented about 25-30 degrees distolaterally relative to the long axis of the calcaneus, and longer than the



corresponding facet on the astragalus. A fibular facet is not present on the lateral side of the ectal facet, which suggests some mobility at the upper ankle joint since the calcaneus does not contact the fibula. The ectal and sustentacular facets are disconnected by an interosseous sulcus. The proximal sustentacular facet is located on a sustentaculum that is fairly large, medially projecting, and positioned mediolateral to the ectal facet. The proximal sustentacular facet is continuous distally, creating a confluent articular surface on the mediolateral side of the bone that ends near the dorsomedial margin of the cuboid facet. Orientations of the proximal and distal sustentacular facets create a concave helical surface for articulation with the corresponding convex astragalar sustentacular facet. This continuity indicates that movements would have occurred between the astragalus and calcaneus at the distal end of the lower ankle joint as well.

The cuboid facet of calcanei attributed to *Purgatorius* is concave and circular in outline and seems well suited for rotation of the cuboid (UCMP 197517 is somewhat abraded and appears to have a square cuboid facet with rounded corners in distal view; Fig. S5). The cuboid facet is oriented approximately 15-20 degrees medially relative to the long axis of the calcaneus. A slight depression is present on the plantar side of the cuboid facet. The anterior plantar tubercle is pronounced, oriented medially, and positioned slightly proximal to the plantar depression of the cuboid facet and just medial to the long axis of the calcaneus. The presence of a groove for the tendon of *M. flexor fibularis* on the plantar aspect of the sustentaculum is variably present in *Purgatorius*, but this groove is never deep. The peroneal tubercle is damaged or missing in most specimens, but it is clearly large and projects laterally when preserved. It arises just proximal to the distal-most aspect of the ectal facet, and ends proximal to the margin of the cuboid facet. This large tubercle is also fairly deep dorsoventrally, especially on its lateral-most aspect as it projects somewhat dorsally. The peroneal tubercle also has a shallow groove on

its lateral side for placement of the tendon of M. peroneus longus, which likely created a more lateral force on the foot for eversion (49). This large tubercle for attachment of peroneal tendons further stresses the importance of eversion and inversion movements of the foot in *Purgatorius*.

#### Comparison of calcanei attributed to *Purgatorius* and *Protungulatum*

The calcanei attributed to *Purgatorius* and *Protungulatum* differ in many ways beyond the considerably larger size of *Protungulatum* (Fig. S5). The lack of contact between the fibula and the calcaneus in *Purgatorius* reduces some of the restrictions of the upper ankle joint that are imposed by such an articulation. The presence of a fibular facet in *Protungulatum* indicates that the fibula would act to oppose forces occurring at the lower ankle joint (44), whereas the reduction of the articulation between the fibula and calcaneus in *Purgatorius* would allow a greater range of movements, including those contributing to the capacity for hind foot reversal for head-first descent (52).

The ectal facet of *Purgatorius* is more proximodistally aligned than that of *Protungulatum*. *Purgatorius* also differs in having a sustentacular facet that extends broadly onto the distal body of the calcaneus. The helical sustentacular facets of the calcaneus and astragalus would enable inversion at the lower ankle joint of *Purgatorius*, whereas this degree of inversion would not have been frequent, if even possible, in *Protungulatum* partly due to its lack of a significant distal continuity of the sustentacular facet. Inversion and eversion of the foot of *Purgatorius* is further facilitated by the simple gliding articulation of the calcaneocuboid facet that is concave and quite circular in outline, whereas *Protungulatum* has a calcaneocuboid facet that is ovoid, less concave, and less symmetrical with a more expanded lateral side. The cuboid facet of *Purgatorius* is also less obliquely oriented relative to the long axis of the calcaneus

compared to that of *Protungulatum*. The peroneal tubercle of the calcaneus is located slightly proximal to the lateral edge of the cuboid facet in *Purgatorius*, whereas it is more distal and level with the cuboid facet in *Protungulatum*.

#### Comparison of calcanei of euarchontan mammals

The calcanei of euarchontan mammals are generally similar to those attributed to *Purgatorius* in the ways that it differs from more terrestrial taxa such as *Protungulatum* (Fig. S5). Similarities include having an ectal facet that is more in line with the long axis of the calcaneus, a sustentacular facet that is distally continuous onto the body, and a cuboid facet that is concave and quite circular in outline. Like the astragali described above, the calcanei attributed to *Purgatorius* are most like those of other plesiadapiforms among euarchontans. One similarity that is especially apparent is the large size of the peroneal tubercle.

The peroneal tubercle of plesiadapiform calcanei and those attributed to *Purgatorius* is considerably larger and more laterally extended than that of euprimates, treeshrews, and colugos. The large size of the peroneal tubercle may be a plesiomorphic retention that was present in the ancestral euarchontan, given that this condition is also present in calcanei of other Puercan eutherians. Euprimates have a peroneal tubercle that is smaller and more proximally placed than that of *Purgatorius*. This change in size and position may relate to the elongation of the euprimate tarsus (53, 54) and or a functional shift in *M. peroneus longus* contributing more as a hallucal adductor than an evertor of the foot as in plesiadapiforms (49, 50). It has also been suggested that *M. peroneus longus* acts more as a plantar-flexor in euprimates (55). Results from a telemetered electromyography study demonstrated that peroneus longus played a greater role in eversion than in hallucal adduction during grasping in two species of lemurid euprimates (56).

Calcanei of micromomyids and those attributed to *Purgatorius* lack a deep groove for the tendon of *M. flexor fibularis*, which has been documented on the plantar side of the sustentaculum in other plesiadapiforms and euprimates. It should also be noted that micromomyids have large origination areas on the tibia and fibula that indicate large flexor muscles (48), and like the astragali attributed to *Purgatorius*, have a broad astragalar flexor fibularis groove. *M. flexor fibularis* contributes to digital flexion and plantarflexion of the foot and has been considered to be important for pedal grasping (43). The lack of a deep groove for flexor fibularis on the calcaneus may suggest the lack of powerful grasping in *Purgatorius* and micromomyids. Treeshrews and colugos also lack the deep groove on the calcaneus for the tendon of *M. flexor fibularis*, which suggests that this condition is primitive for Euarchonta.

Specimens attributed to *Purgatorius* appear to lack a distinct posterior facet of the sustentaculum tali for articulation with the sustentacular facet on the plantar aspect of the medial astragalar pillar. This may also be true for micromomyids, which also have a somewhat flat posterior surface of the sustentaculum tali, yet this facet may simply not be distinct due to the small body size of these taxa. This articulation has been suggested to occur during maximum inversion to increase stability and has been documented on the calcaneus of plesiadapiforms, colugos, and treeshrews, but is much less common in extant and fossil euprimates (47). The calcaneocuboid facet of *Purgatorius* is most like that of non-carpolestid plesiadapiforms, dermopterans, and euprimates in having a plantar pit on the facet (47, 48). Scandentians lack a pit and have an evenly concave facet. Like most other plesiadapiform calcanei, specimens attributed to *Purgatorius* differ from euprimates and large plesiadapids, which have a central and deeper plantar pit on the calcaneocuboid facet that creates a specialized axis of rotation with the proximally projecting process of the cuboid at the transverse tarsal joint (47). The condition of

the calcaneocuboid pit of dermopterans may inhibit rotation due to its irregular funnel shape, as well as the flat navicular facet on the calcaneum (57). Overall, tarsals attributed to *Purgatorius* indicate a mobile ankle similar to that of arboreal euarchontan mammals generally, and plesiadapiforms specifically, and further support the hypothesis that arboreality was present in the ancestors of Euarchonta and Primates (11, 21, 43, 44, 48, 58, 59).

## Supporting Information References

1. Nunn CL (2011) *The comparative approach in evolutionary anthropology and biology* (The University of Chicago Press, Chicago, IL).
2. Zar JH (1984) *Biostatistical Analysis* (Prentice-Hall, Englewood Cliffs, NJ).
3. Boyer DM, Seiffert ER, Simons EL (2010) Astragalar morphology of *Afradapis*, a large adapiform primate from the earliest late Eocene of Egypt. *Am J Phys Anthropol* 143(3):383-402.
4. Boyer DM (2009) *New cranial and postcranial remains of late Paleocene Plesiadapidae ("Plesiadapiforms," Mammalia) from North America and Europe: Description and evolutionary implications* (Stony Brook University, Stony Brook, NY).
5. Hammer O, Harper DAT, Ryan PD (2001) Past: paleontological statistics software package for education and data analysis. *Palaeontol Electron* 4:1.
6. Goswami A, et al. (2011) A radiation of arboreal basal eutherian mammals beginning in the Late Cretaceous of India. *Proc Natl Acad Sci USA* 108(39):16333-16338.
7. Wible JR, Rougier GW, Novacek MJ, Asher RJ (2007) Cretaceous eutherians and Laurasian origin for placental mammals near K-T boundary. *Nature* 447:1003-1006.
8. Wible JR, Rougier GW, Novacek MJ, Asher RJ (2009) The eutherian mammal *Maelestes gobiensis* from the Late Cretaceous of Mongolia and the phylogeny of Cretaceous Eutheria. *Bull Amer Mus Nat Hist* 327:1-123.
9. Fox RC (1984) The dentition and relationship of the Paleocene primate *Micromomys Szalay*, with description of a new species. *Can J Earth Sci* 21(11):1262-1267.
10. Chester SGB, Bloch JI (2013) Systematics of Paleogene Micromomyidae (Euarchonta, Primates) from North America. *J Hum Evol* 65(2):109-142.

11. Bloch JI, Silcox MT, Boyer DM, Sargis EJ (2007) New Paleocene skeletons and the relationship of plesiadapiforms to crown-clade primates. *Proc Natl Acad Sci USA* 104(4):1159-1164.
12. Szalay FS (1974) A new species and genus of early Eocene primate from North America. *Folia Primatol* 22:243–250.
13. Bloch JI, Gingerich PD (1998) *Carpolestes simpsoni*, new species (Mammalia, Proprimates) from the Late Paleocene of the Clarks Fork Basin, Wyoming. *Contrib Mus Paleontol Univ Mich* 30:131-162.
14. Bloch JI, Boyer DM (2002) Grasping primate origins. *Science* 298(5598):1606-1610.
15. Bloch JI, Silcox MT (2006) Cranial anatomy of Paleocene plesiadapiform *Carpolestes simpsoni* (Mammalia, Primates) using ultra high-resolution X-ray computed tomography, and the relationships of “plesiadapiforms” to Euprimates. *J Hum Evol* 50:1-35.
16. Kielan-Jaworowska Z, Bown TM, Lillegraven, JA (1979) Eutheria. *Mesozoic Mammals: The First Two-thirds of Mammalian History*, eds Lillegraven JA, Kielan-Jaworowska Z, Clemens WA (University of California Press, Berkeley) pp 221-258.
17. Clemens WA (1974) *Purgatorius*, an early paromomyid primate. *Science* 184(4139):903-905.
18. Clemens WA (2004) *Purgatorius* (Plesiadapiformes, Primates?, Mammalia), a Paleocene immigrant into northeastern Montana: Stratigraphic occurrences and incisor proportions. *Bull Carnegie Mus Nat Hist* 36:3-13.
19. Boyer DM, Scott CS, Fox RC (2012) New craniodental material of *Pronothodectes gaoi* (Mammalia, “Plesiadapiforms”) and relationships among members of Plesiadapidae. *Am J Phys Anthropol* 147:511-550.

20. Wible JR (2011) On the treeshrew skull (Mammalia, Placentalia, Scandentia). *Ann Carnegie Mus* 79(3):149-230.
21. Szalay FS, Dagosto M (1980) Locomotor adaptations as reflected on the humerus of Paleogene primates. *Folia Primatol* 34(1-2):1-45.
22. Szalay FS (1969) Origin and evolution of the mesonychid condylarth feeding mechanism. *Evolution* 23(4):703-720.
23. Goloboff PA, Farris JS, Nixon KC (2008) TNT, a free program for phylogenetic analysis. *Cladistics* 24(5):774-786.
24. Silcox MT, Bloch JI, Boyer DM, Houde P (2010) Cranial anatomy of Paleocene and Eocene *Labidolemur kayi* (Mammalia: Apatotheria), and the relationships of the Apatemyidae to other mammals. *Zool J Linn Soc* 160(4):773-825.
25. Ni X, et al. (2013) The oldest known primate skeleton and early haplorhine evolution. *Nature* 498(7452):60-64.
26. Ni X, Wang Y, Hu Y, Li C (2004) A euprimate skull from the early Eocene of China. *Nature* 427:65-68.
27. Ni X, et al. (2010) A new tarkadectine primate from the Eocene of Inner Mongolia, China: phylogenetic and biogeographic implications. *Proc R Soc B* 277(1679):247-256.
28. MacPhee RDE, Cartmill M, Rose KD (1989) Craniodental morphology and relationships of the supposed Eocene dermopteran *Plagiomene* (Mammalia). *J Vertebr Paleontol* 9(3):329-349.
29. Archibald JD (1982) A study of Mammalia and geology across the Cretaceous-Tertiary boundary in Garfield County, Montana. *Univ California Pub Geol Sci* 122:1-286.



30. Clemens WA, Hartman JH (2014) From *Tyrannosaurus rex* to asteroid impact: Early studies (1901-1980) of the Hell Creek Formation in its type area. *Geol Soc Amer Special Paper* 503:1-88.
31. Collier AJ, Knechtel M (1939) The coal resources of McCone County, Montana: *U.S. Geol Surv Bull* 905:1-80.
32. Sprain CJ, Renne PR, Wilson GP, Clemens WA (2014) High-Resolution Chronostratigraphy of the Terrestrial Cretaceous-Paleogene Transition and Recovery Interval in the Hell Creek Region, Montana. *Bull Geol Soc America*. 10.1130/B31076.1
33. Folinsbee RE, Baadsgaard H, Cumming GL (1963) Dating of volcanic ash beds (bentonites) by the K-Ar method. *Nuclear Geophysics*, 1075:70-82.
34. Swisher CC III, Dingus L, Butler RF (1993)  $^{40}\text{Ar}/^{39}\text{Ar}$  dating and magnetostratigraphic correlation of the terrestrial Cretaceous-Paleogene boundary and Puercan Mammal Age, Hell Creek-Tullock formations, eastern Montana. *Can J Earth Sci* 30(9):1981-1996.
35. Renne PR, Deino AL, Hilgen FJ, Kuiper KF, Mark DF, Mitchell III WS, Morgan LE, Mundil R, Smit (2013) Time scales of critical events around the Cretaceous-Paleogene boundary. *Science* 339:684-687.
36. Archibald JD, Butler RF, Lindsay, EH, Clemens WA, Dingus L (1982) Upper Cretaceous–Paleocene biostratigraphy and magnetostratigraphy, Hell Creek and Tullock Formations, northeastern Montana. *Geology* 10:153–159.
37. LeCain R, Clyde WC, Wilson GP, Riedel J (2014) Magnetostratigraphy of the Hell Creek and Lower Fort Union Formations in northeastern Montana. *Geol Soc Amer Special Paper* 503:137-147.

38. Lofgren DL, Lillegraven JA, Clemens WA, Gingerich PD, Williamson TE (2004) Paleocene biochronology: The Puercan through Clarkforkian Land Mammal Ages. *Late Cretaceous and Cenozoic mammals of North America: Geochronology and biostratigraphy*, ed. Woodburne MO (Columbia Univ Press, New York) pp 43-105.
39. Simmons NB (1987) A revision of *Taeniolabis* (Mammalia: Multituberculata), with a new species from the Puercan of eastern Montana. *J Vertebr Paleontol* 61(4):794-808.
40. Clemens WA (2013) Cf. *Wortmania* from the early Paleocene of Montana and evolution of the initial diversification of the Taeniodonta (Mammalia). *Canad Jour Earth Sci* 50:341-354.
41. Wilson GP (2014) Mammalian extinction, survival, and recovery dynamics across the Cretaceous-Paleogene boundary in northeastern Montana. *Geo Soc America Special Paper* 503:365-392.
42. Gebo DL (2011) Vertical clinging and leaping revisited: vertical support use as the ancestral condition of strepsirrhine primates. *Am J Phys Anthropol* 146(3):323-335.
43. Szalay FS, Drawhorn G (1980) Evolution and diversification of the Archonta in an arboreal milieu. *Comparative Biology and Evolutionary Relationships of Tree Shrews*, ed Lockett WP (Plenum Press, New York) pp 133-169.
44. Szalay FS, Decker RL (1974) Origins, evolution, and function of the tarsus in Late Cretaceous Eutheria and Paleocene primates. *Primate Locomotion*, ed Jenkins FA Jr. (Academic Press, New York) pp 223-254.
45. Springer MS, et al. (2012) Macroevolutionary dynamics and historical biogeography of primate diversification inferred from a species supermatrix. *PLoS One*. DOI 10.1371/journal.pone.0049521.

46. Boyer DM, Seiffert ER (2013) Patterns of astragalar fibular facet orientation in extant and fossil primates and their evolutionary implications. *Am J Phys Anthropol* 151(3):420-447.
47. Beard KC (1989) *Postcranial anatomy, locomotor adaptations, and paleoecology of early Cenozoic Plesiadapidae, Paromomyidae, and Micromomyidae (Eutheria, Dermoptera)*. (Johns Hopkins Univ, Baltimore, MD).
48. Bloch JI, Boyer DM (2007) New skeletons of Paleocene-Eocene plesiadapiformes: A diversity of arboreal positional behaviors in early primates. *Primate Origins: Adaptations and Evolution* eds Ravosa MJ, Dagosto M (Plenum Press, New York) pp 535-582.
49. Gebo DL (1988) Foot morphology and locomotor adaptation in Eocene primates. *Folia Primatol* 50(1-2):3-41.
50. Dagosto M (1988) Implications of postcranial evidence for the origin of euprimates. *J Hum Evol* 17(1-2):35-56.
51. Chester SGB, Beard KC (2012) New micromomyid plesiadapiforms (Mammalia, Euarchonta) from the late Paleocene of Big Multi Quarry, Washakie Basin, Wyoming. *Ann Carnegie Mus* 80(2):159-172.
52. Jenkins FA, McClearn DM (1984) Mechanisms of hind foot reversal in climbing mammals. *J Morphol* 182(2):197-219.
53. Decker RL, Szalay FS (1974) Origins and function of the pes in the Eocene Adapidae (Lemuriformes, Primates). *Primate Locomotion*, ed Jenkins FA Jr. (Academic Press, New York) pp 261-291.

54. Boyer DM, Seiffert ER, Gladman JT, Bloch JI (2013) Evolution and allometry of calcaneal elongation in living and extinct primates. *PLoS One* DOI: 10.1371/journal.pone.0067792.
55. Gunnell GF (1989) Evolutionary history of Microsyopoidea (Mammalia, ?Primates) and the relationship between plesiadapiforms and primates. *Univ Mich Pap Paleontol*: 27.
56. Boyer DM, Patel BA, Larson SG, Stern JT Jr. (2007) Telemetered electromyography of peroneus longus in *Varecia variegata* and *Eulemur rubriventer*: implications for the functional significance of a large peroneal process. *J Hum Evol* 53(2):119-134.
57. Hooker JJ (2001) Tarsals of the extinct insectivoran family Nyctitheriidae (Mammalia): evidence for archontan relationships. *Zool J Linn Soc* 132(4):501-529.
58. Boyer DM, Yapuncich GS, Chester SGB, Bloch JI, Godinot M (2013) Hands of early primates. *Yearb Phys Anthropol* 57:33-78.
59. Kirk EC, Lemelin P, Hamrick MW, Boyer DM, Bloch JI (2008) Intrinsic hand proportions of euarchontans and other mammals: implications for the locomotor behavior of plesiadapiforms. *J Hum Evol* 55(2):278-299.

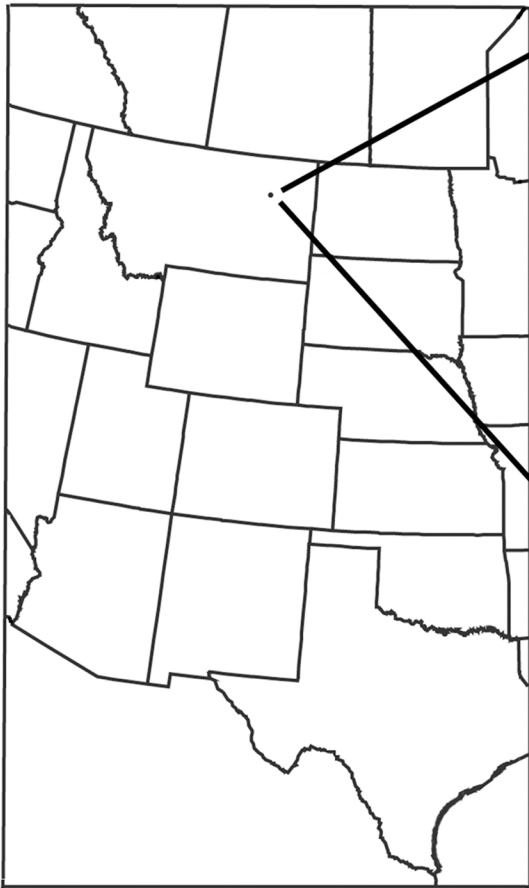

**a**

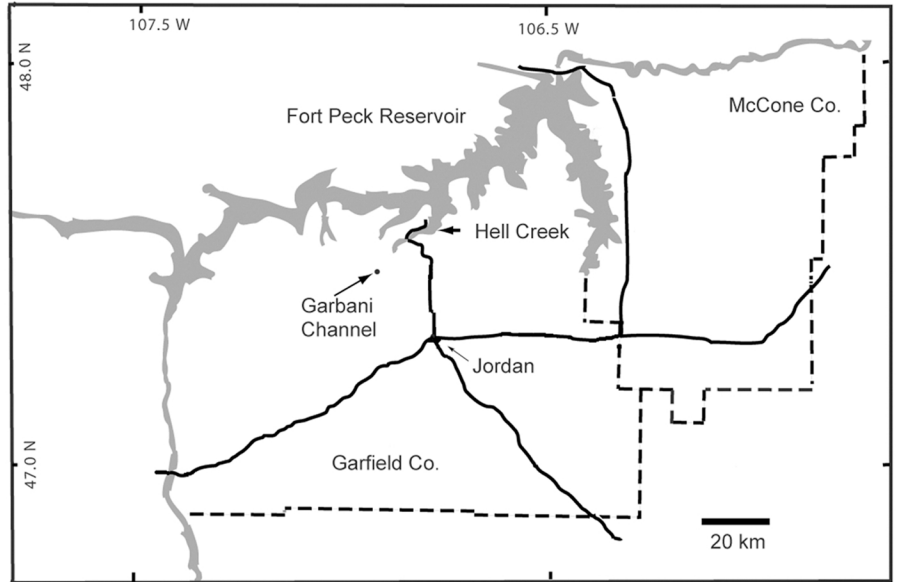

**b**

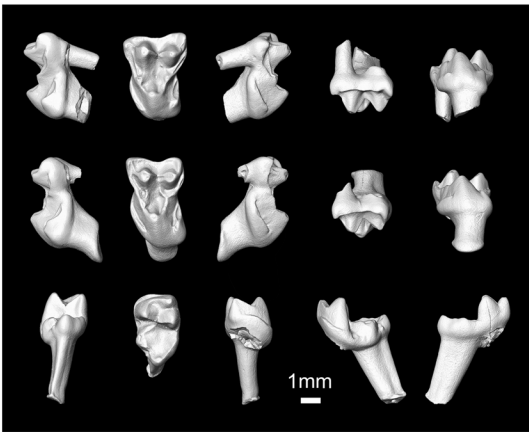

**c**

|                   | Paleocene<br>Local faunas             | Composite Section | Age (Ma)       | NALMA   | Polarity |      |
|-------------------|---------------------------------------|-------------------|----------------|---------|----------|------|
| Lebo<br>Fm.       |                                       | U Coal            | 64.866 ± 0.023 |         |          | C28n |
|                   |                                       | V Coal            | 65.041 ± 0.023 |         |          | C28r |
|                   | Farrand<br>Channel<br>local<br>fauna  | W Coal            | 65.118 ± 0.024 | To1     |          |      |
|                   |                                       | X Coal            |                | Pu3     |          |      |
|                   |                                       | Y Coal            | 65.741 ± 0.022 | Pu2     |          |      |
|                   | Garbani<br>Channel<br>local<br>faunas | HFZ Coal          | 65.973 ± 0.020 |         |          |      |
|                   |                                       | Z Coal            | 66.013 ± 0.015 | Pu1     |          |      |
|                   |                                       | IrZ Coal          | 66.043 ± 0.010 |         |          |      |
|                   | Hell<br>Hollow<br>local<br>fauna      |                   |                |         |          |      |
|                   |                                       |                   |                |         |          |      |
| Hell Creek<br>Fm. |                                       |                   |                | Lancian |          | C29r |

**d**

**Fig. S1.** Locality maps, stratigraphic column, and *Purgatorius* dental fossils from study area. **(a)** Location of Garfield County in northeastern Montana. **(b)** Location of the outcrops of the Garbani Channel in Garfield County north of the town of Jordan, MT. **(c)** Micro-CT scan images of *Purgatorius* teeth from the late Puercan (Pu3; ~65 MYA) Garbani Channel fauna locality UCMP V99038. UCMP 197540, left first upper molar (top row); UCMP 197546, left second upper molar (middle row); UCMP 197553, left third lower molar (bottom row) in distal, occlusal, mesial, buccal and lingual views, respectively (from left to right). Scale bar, 1mm. **(d)** Generalized stratigraphic section of the Tullock Formation in the valley of Hell Creek and adjacent areas. Sources of the radiometric age and magnetic polarity determinations are discussed in the text.

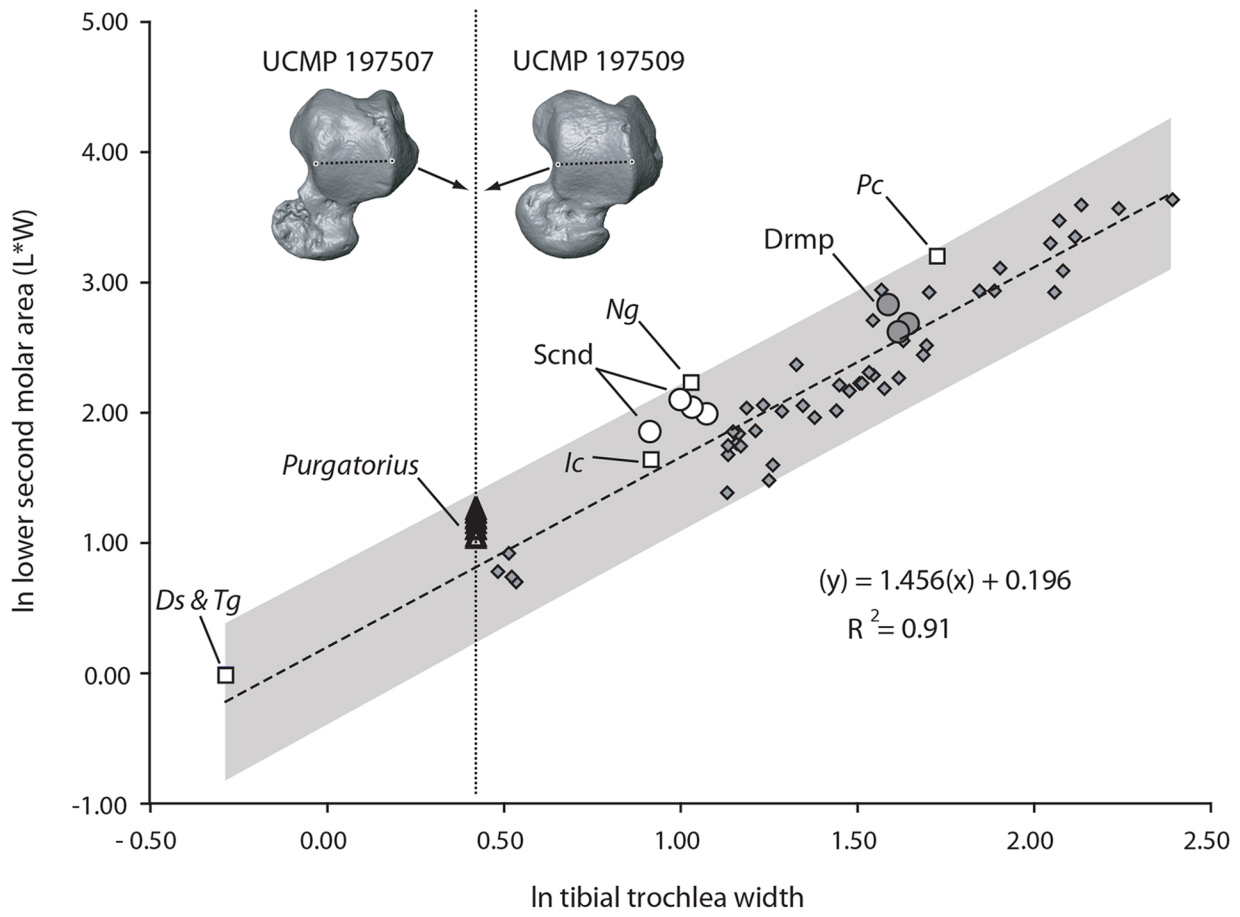

**a**

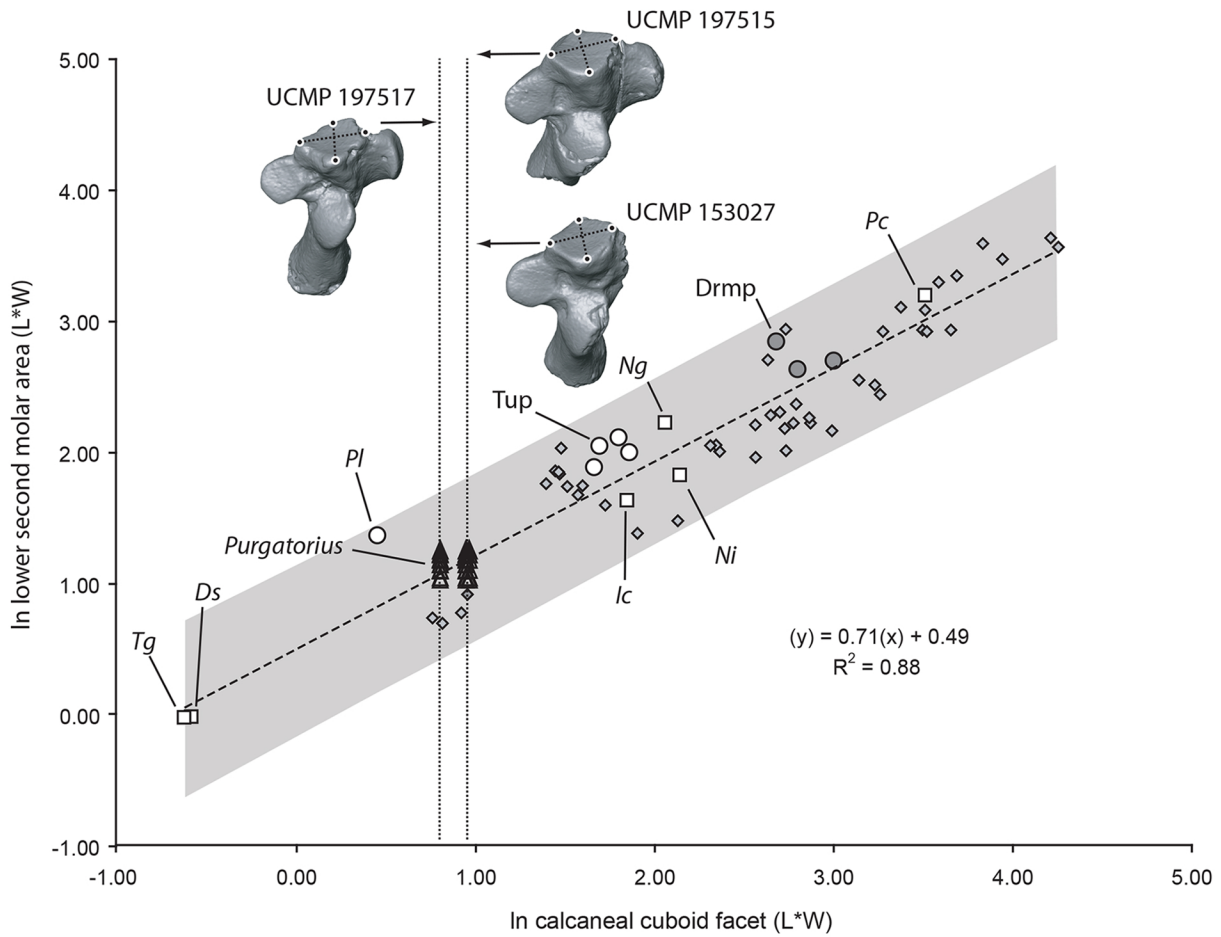

**b**

**Fig. S2.** Least squares plots to evaluate the scaling relationship between aspects of the dentition and tarsals in euarchontan mammals. **(a)** Least squares plot to evaluate the scaling relationship between the natural log of second lower molar area (maximum length \* maximum width) and the natural log of astragalar lateral tibial facet width in euarchontan mammals. **(b)** Least squares plot to evaluate the scaling relationship between the natural log of second lower molar area (maximum length \* maximum width) and the natural log of calcaneocuboid facet area (maximum depth \* maximum width) in euarchontan mammals. See S-Table 2 for taxonomic sample and tarsal measurements. *Purgatorius* dental specimens were collected at Garbani Channel fauna locality UCMP V73080 (see S-Table 3 for *Purgatorius* dental and tarsal measurements). 95% confidence limits on the prediction interval of molar values from tarsal values are shaded in gray. Small gray diamonds represent euprimates, white circles represent Scandentia (Scnd, Scandentia; Tup, Tupaiidae; *Pl*, *Ptilocercus lowii*), gray circles represent Dermoptera (Drmp), white squares represent plesiadapiforms (*Ds*, *Dryomomys szalayi*; *Tg*, *Tinimomys graybulliensis*; *Ic*, *Ignacius clarkforkensis*; *Ng*, *Nannodectes gidleyi*; *Ni*, *Nannodectes intermedius*; *Pc*, *Plesiadapis cookei*), and black triangles represent the range (all possible combinations) of new isolated tarsals and lower second molars of *Purgatorius* from the Garbani Channel fauna localities.



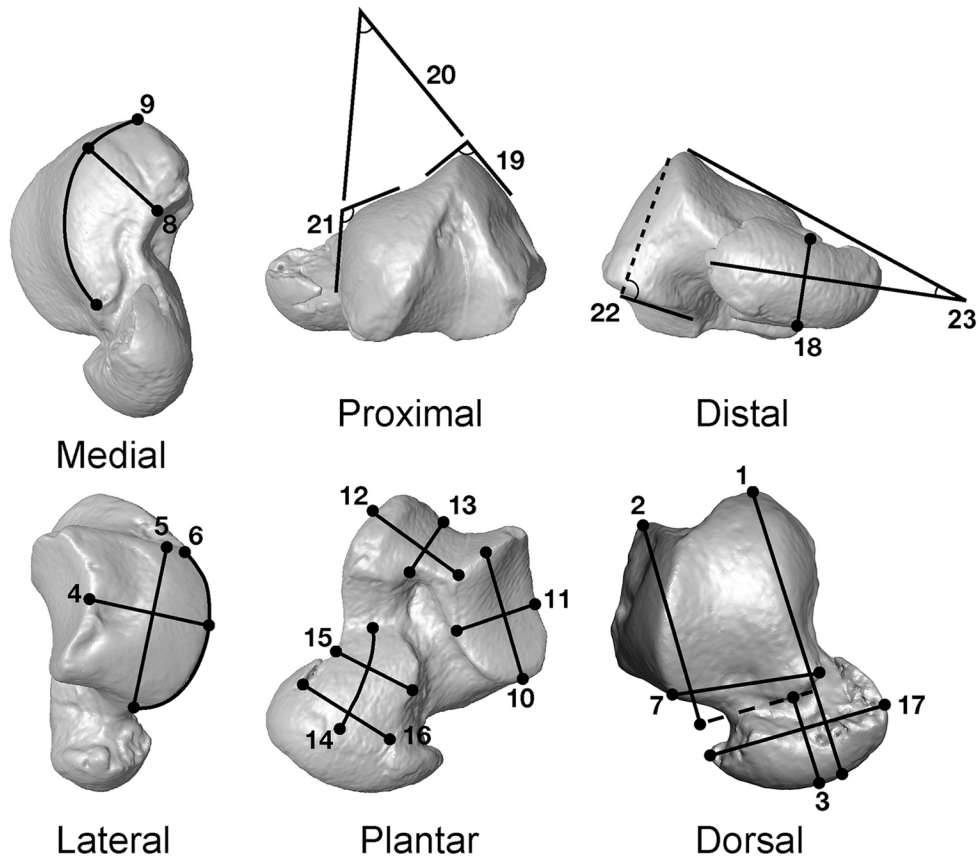

**a**

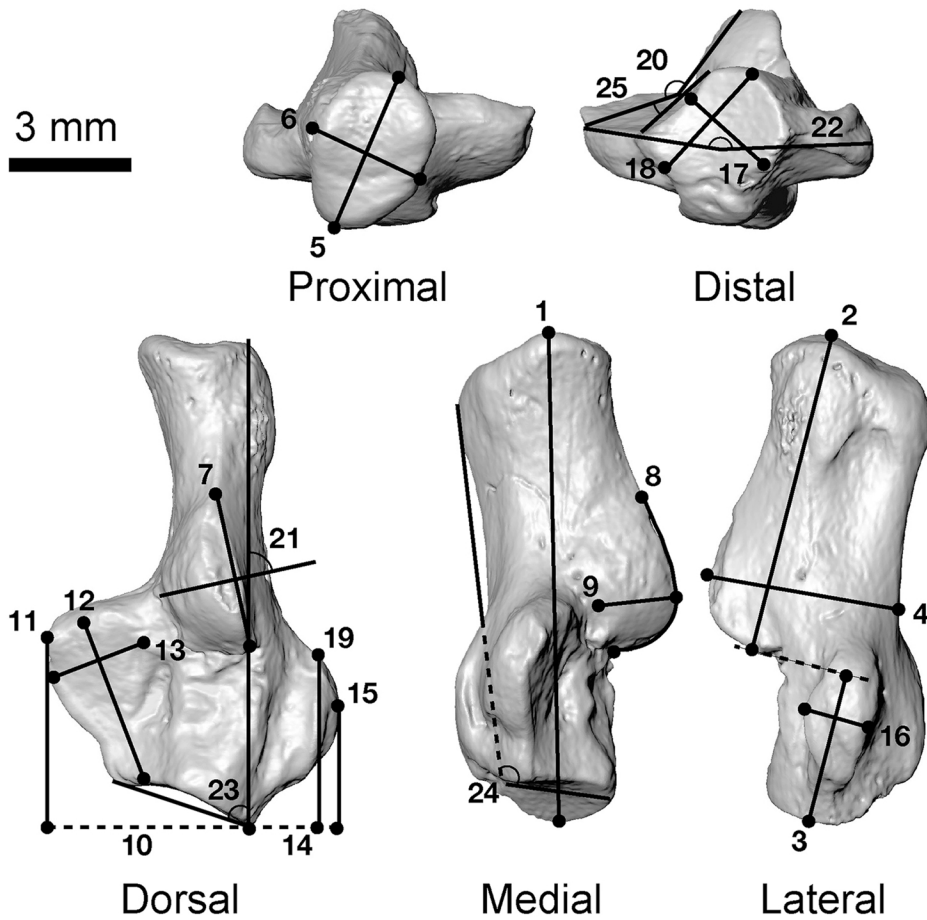

**b**

**Fig. S3.** Tarsal measurements. **(a)** Astragalar measurements following (3). See S-Table 4 for measurement data used in principle component analysis. 1, Maximum proximodistal length; 2, Body proximodistal length; 3, Head and neck proximodistal length; 4, Fibular facet maximum dorsoplantar depth; 5, Fibular facet proximodistal length; 6, Lateral tibial facet maximum proximodistal length (along lateral margin); 7, Lateral tibial facet maximum mediolateral width; 8, Medial tibial facet maximum dorsoplantar depth; 9, Medial tibial facet maximum proximodistal length (along medial margin); 10, Ectal facet proximodistal length; 11, Ectal facet mediolateral width; 12, Flexor fibularis groove mediolateral width; 13, Flexor fibularis groove proximodistal length; 14, Sustentacular facet proximodistal length; 15, Sustentacular facet mediolateral width; 16, Sustentacular facet width of articulation with navicular facet; 17, Head maximum mediolateral width; 18, Head maximum dorsoplantar depth; 19, Angle between fibular facet and lateral tibial facet; 20, Angle between fibular facet and medial tibial facet; 21, Angle between medial and lateral tibial facets; 22, Angle between ectal and fibular facets; 23 Angle between major axis of head and plane of lateral tibial facet. **(b)** Calcaneal measurements following (4). See S-Table 5 for measurement data used in principle component analysis. 1, Maximum proximodistal length; 2, Tuber proximodistal length; 3, Distal calcaneus length; 4, Tuber maximum dorsoplantar depth; 5, Tuber proximal end dorsoplantar depth; 6, Tuber proximal end mediolateral width; 7, Ectal facet proximodistal length; 8, Ectal facet maximum length (along arc); 9, Ectal facet mediolateral width; 10, Medial projection of sustentaculum from ectal facet lateral margin; 11, Sustentaculum medial apex from distal end of calcaneus, proximodistal length; 12, Sustentacular facet proximodistal length; 13, Sustentacular facet mediolateral width; 14, Lateral projection of peroneal tubercle from ectal facet lateral margin; 15, Peroneal tubercle lateral apex from distal end of calcaneus, proximodistal length; 16,

Peroneal tubercle dorsoplantar depth; 17, Diameter of calcaneocuboid facet perpendicular to sustentacular facet; 18, Diameter of calcaneocuboid facet parallel to sustentacular facet; 19, Peroneal tubercle proximal margin from distal end of calcaneus, proximodistal length; 20, Angle between ectal facet surface (parallel to its axis) and proximal part of sustentacular facet surface (parallel to its axis); 21, Angle between ectal facet axis and tuber; 22, Angle between peroneal tubercle and sustentaculum; 23, Mediolateral angle between calcaneocuboid facet and tuber axis; 24, Dorsoplantar angle between calcaneocuboid facet and tuber axis; 25, Angle between surface of proximal part of sustentacular facet (parallel to its axis) and distal part of sustentacular facet (parallel to its axis).

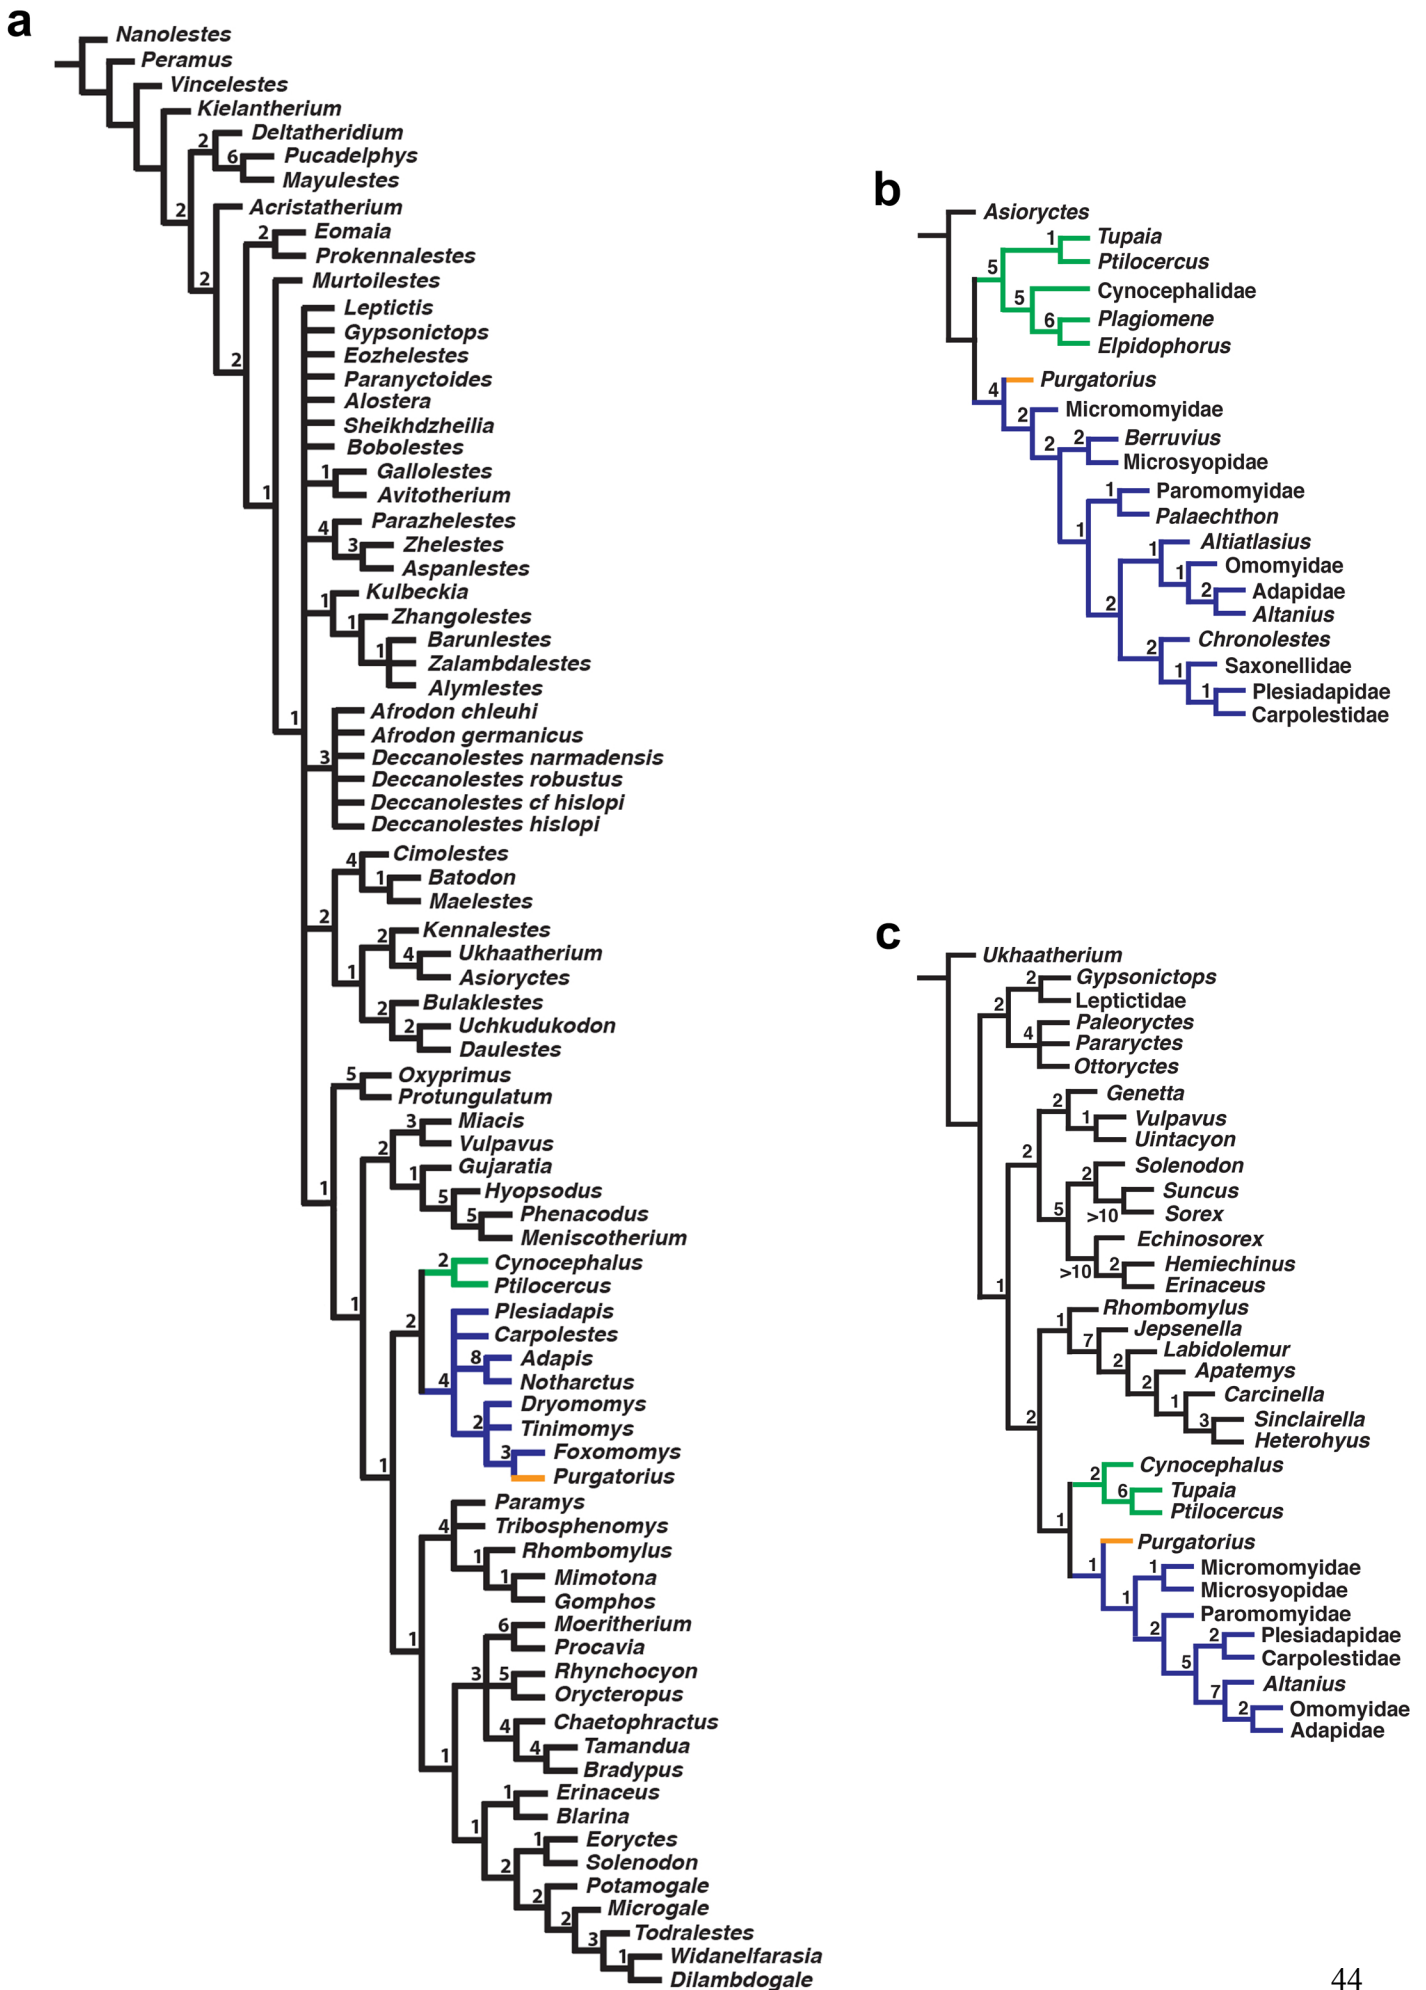

**Fig. S4.** Hypotheses of evolutionary relationships of *Purgatorius* and other eutherian mammals.

**(a)** Resulting strict consensus cladogram modified from character matrix of (6) (see S-Table 8) with addition of *Purgatorius* tarsal data and five euarchontan taxa (colugo *Cynocephalus*, micromomyid plesiadapiforms *Foxomomys*, *Dryomomys*, *Tinimomys*, and carpolesiid plesiadapiform *Carpolestes*). **(b)** Resulting single-most-parsimonious cladogram modified from character matrix of (11) (see S-Table 9) with addition of *Purgatorius* tarsal data. **(c)** Resulting strict consensus cladogram modified from character matrix of (24) (see S-Table 10) with addition of *Purgatorius* tarsal data. In all cladograms Sundatheria is supported and indicated in green, Primates is supported and indicated in violet, and *Purgatorius* is supported as a primate and indicated in orange. Bremer support indices calculated in TNT are located above branches.

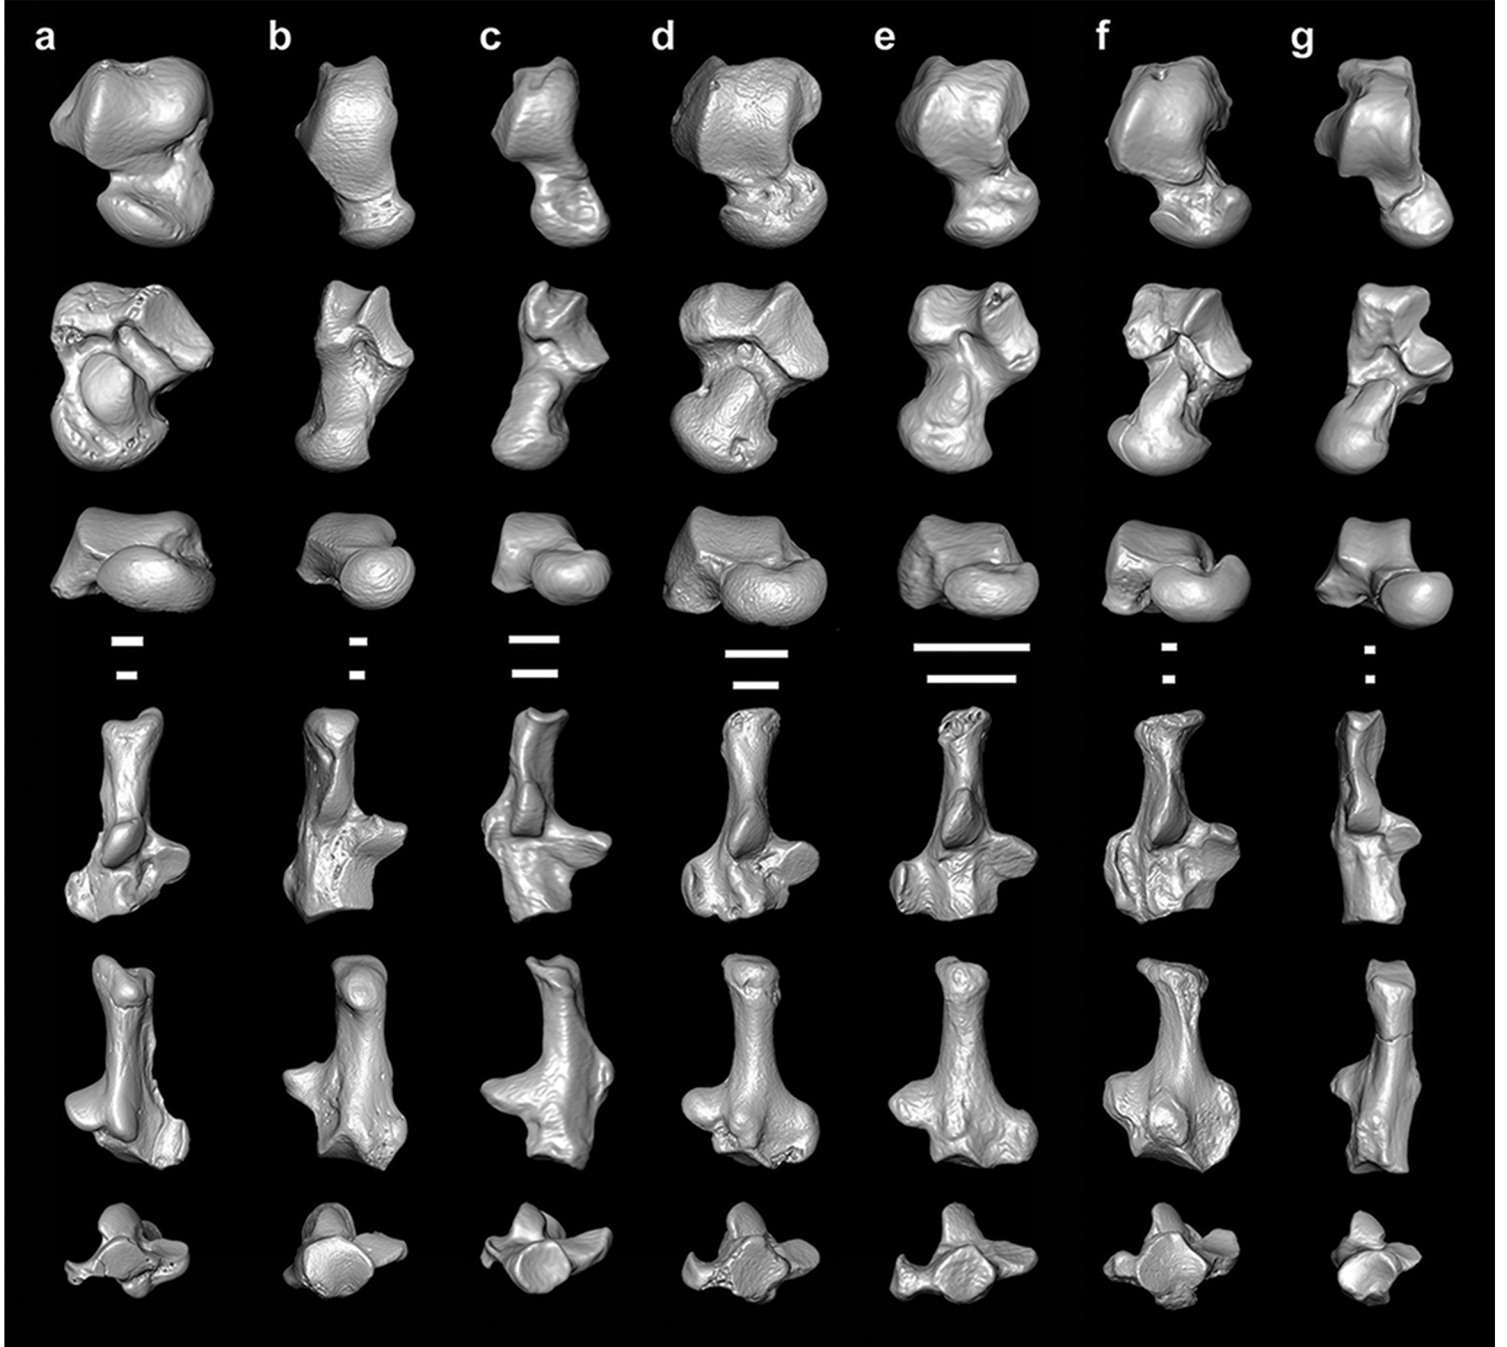

**Fig. S5.** Comparison of micro-CT scan images of tarsal bones. Columns illustrate tarsals of condylarth *Protungulatum* (**a**), colugo *Cynocephalus* (**b**), treeshrew *Ptilocercus* (**c**), *Purgatorius* (**d**), micromomyid plesiadapiform *Dryomomys* (**e**), plesiadapid plesiadapiform *Plesiadapis* (**f**), and adapoid euprimate *Notharctus* (**g**). Right astragali (top three rows) and calcanei (bottom three rows) illustrated in dorsal (top), plantar (middle), and distal (bottom) views, respectively. Some elements are reversed for clarity. Scale bars for respective astragali (top) and calcanei (bottom), all 1mm. Specimen numbers for astragali and calcanei, respectively, or for both, are as follows: *Protungulatum* (AMNH 118260, 118060); *Cynocephalus* (UNSM 15502, AMNH 207001); *Ptilocercus* (USNM 488072); *Purgatorius* (UCMP 197509, 197517); *Dryomomys* (UM 41870); *Plesiadapis* (UM 87990); *Notharctus* (AMNH 11474).

## Supplementary Tables

**Table S1.** Tarsal specimens attributed to *Purgatorius* from the Garbani Channel Fauna

| <b>Order</b> | <b>Taxon</b>       | <b>Catalogue Number</b> | <b>Locality</b> | <b>Element</b> |
|--------------|--------------------|-------------------------|-----------------|----------------|
| Primates     | <i>Purgatorius</i> | UCMP 153013             | UCMP V75194     | calcaneus      |
| Primates     | <i>Purgatorius</i> | UCMP 153027             | UCMP V74122     | calcaneus      |
| Primates     | <i>Purgatorius</i> | UCMP 177255             | UCMP V72128     | calcaneus      |
| Primates     | <i>Purgatorius</i> | UCMP 197482             | UCMP V72128     | calcaneus      |
| Primates     | <i>Purgatorius</i> | UCMP 197485             | UCMP V74122     | astragalus     |
| Primates     | <i>Purgatorius</i> | UCMP 197486             | UCMP V74122     | astragalus     |
| Primates     | <i>Purgatorius</i> | UCMP 197487             | UCMP V74122     | calcaneus      |
| Primates     | <i>Purgatorius</i> | UCMP 197489             | UCMP V74122     | astragalus     |
| Primates     | <i>Purgatorius</i> | UCMP 197507             | UCMP V99438     | astragalus     |
| Primates     | <i>Purgatorius</i> | UCMP 197508             | UCMP V99438     | calcaneus      |
| Primates     | <i>Purgatorius</i> | UCMP 197509             | UCMP V99438     | astragalus     |
| Primates     | <i>Purgatorius</i> | UCMP 197511             | UCMP V99438     | astragalus     |
| Primates     | <i>Purgatorius</i> | UCMP 197513             | UCMP V99438     | astragalus     |
| Primates     | <i>Purgatorius</i> | UCMP 197515             | UCMP V99438     | calcaneus      |
| Primates     | <i>Purgatorius</i> | UCMP 197516             | UCMP V99438     | calcaneus      |
| Primates     | <i>Purgatorius</i> | UCMP 197517             | UCMP V99438     | calcaneus      |



**Table S2.** Data for regression of tooth dimensions on tarsal dimensions

| Order           | Taxon                                  | Catalogue Number    | aW    | cW   | cD   | tL   | tW   |
|-----------------|----------------------------------------|---------------------|-------|------|------|------|------|
| Dermoptera      | <i>Galeopterus variegatus</i>          | UNSM ZM 15502       | 4.93  | 4.14 | 3.55 | 4.46 | 3.81 |
| Dermoptera      | <i>Galeopterus variegatus</i>          | BAA NN              | 5.08  | 4.53 | 3.66 | 3.91 | 3.49 |
| Dermoptera      | <i>Cynocephalus volans</i>             | FMNH 61032          | 5.20  | 5.30 | 3.85 | 3.99 | 3.67 |
| Primates        | <i>Avahi laniger laniger</i>           | AMNH 170461         | 5.10  | 5.29 | 4.37 | 4.27 | 3.01 |
| Primates        | <i>Daubentonia madagascariensis</i>    | AMNH 185643         | 6.61  | 7.74 | 4.99 | 4.85 | 3.88 |
| Primates        | <i>Eulemur fulvus fulvus</i>           | AMNH 31254          | 6.71  | 6.43 | 4.54 | 6.06 | 3.70 |
| Primates        | <i>Eulemur mongoz</i>                  | AMNH 17403          | 5.49  | 5.70 | 4.64 | 5.36 | 3.47 |
| Primates        | <i>Euoticus elegantulus</i>            | AMNH 269914         | 3.49  | 3.27 | 2.57 | 2.43 | 1.81 |
| Primates        | <i>Galago crassicaudatus</i>           | AMNH 216239         | 5.45  | 5.93 | 4.26 | 3.79 | 3.27 |
| Primates        | <i>Galago crassicaudatus</i>           | AMNH 216244         | 5.40  | 5.90 | 4.41 | 3.78 | 3.05 |
| Primates        | <i>Galago senegalensis</i>             | AMNH 119521         | 3.10  | 2.60 | 2.58 | 2.21 | 1.81 |
| Primates        | <i>Galago senegalensis</i>             | AMNH 244100         | 3.53  | 2.80 | 2.00 | 2.38 | 2.08 |
| Primates        | <i>Hapalemur griseus</i>               | AMNH 170689         | 4.80  | 4.53 | 3.39 | 4.91 | 3.86 |
| Primates        | <i>Hapalemur griseus griseus</i>       | AMNH 61589          | 4.68  | 4.86 | 2.86 | 4.52 | 3.32 |
| Primates        | <i>Indri indri</i>                     | AMNH 100504         | 9.38  | 9.15 | 7.69 | 6.84 | 5.18 |
| Primates        | <i>Lemur catta</i>                     | AMNH 22912          | 6.33  | 7.30 | 4.52 | 5.12 | 3.68 |
| Primates        | <i>Lemur catta</i>                     | AMNH 170739         | 7.83  | 7.58 | 4.46 | 5.16 | 3.61 |
| Primates        | <i>Lepilemur mustelinus leucopus</i>   | AMNH 170569         | 4.22  | 4.73 | 3.25 | 3.46 | 2.17 |
| Primates        | <i>Lepilemur mustelinus leucopus</i>   | AMNH 170568         | 4.84  | 4.70 | 3.25 | 3.56 | 2.50 |
| Primates        | <i>Lepilemur mustelinus leucopus</i>   | AMNH 170556         | 4.51  | 4.53 | 3.54 | 3.78 | 2.45 |
| Primates        | <i>Lepilemur mustelinus leucopus</i>   | AMNH 170559         | 4.26  | 4.53 | 2.86 | 3.87 | 2.36 |
| Primates        | <i>Lepilemur mustelinus leucopus</i>   | AMNH 170560         | 4.69  | 4.51 | 3.13 | 3.86 | 2.55 |
| Primates        | <i>Lepilemur mustelinus leucopus</i>   | AMNH 170565         | 3.84  | 3.60 | 2.80 | 3.32 | 2.35 |
| Primates        | <i>Microcebus griseorufus</i>          | AMNH 174430         | 1.62  | 1.51 | 1.66 | 1.57 | 1.39 |
| Primates        | <i>Microcebus griseorufus</i>          | AMNH 174415         | 1.71  | 1.71 | 1.32 | 1.55 | 1.30 |
| Primates        | <i>Microcebus griseorufus</i>          | AMNH 174472         | 1.68  | 1.57 | 1.36 | 1.60 | 1.31 |
| Primates        | <i>Microcebus griseorufus</i>          | AMNH 174383         | 1.67  | 1.73 | 1.50 | 1.86 | 1.35 |
| Primates        | <i>Nycticebus coucang</i>              | AMNH 90381          | 3.62  | 3.96 | 2.68 | 3.06 | 2.44 |
| Primates        | <i>Nycticebus coucang javanicus</i>    | AMNH 102027         | 3.97  | 5.03 | 2.58 | 3.10 | 2.30 |
| Primates        | <i>Nycticebus coucang menagensis</i>   | AMNH 16591          | 3.43  | 2.71 | 3.84 | 2.80 | 2.80 |
| Primates        | <i>Perodicticus potto</i>              | AMNH 184597         | 4.54  | 4.75 | 3.71 | 3.62 | 2.56 |
| Primates        | <i>Perodicticus potto</i>              | AMNH 269851         | 4.63  | 4.50 | 3.30 | 3.60 | 2.80 |
| Primates        | <i>Perodicticus potto</i>              | AMNH 269907         | 5.04  | 5.03 | 3.48 | 3.55 | 2.72 |
| Primates        | <i>Perodicticus potto</i>              | AMNH 52698          | 4.38  | 5.29 | 3.76 | 3.21 | 2.72 |
| Primates        | <i>Perodicticus potto</i>              | AMNH 86898          | 3.77  | 4.40 | 3.70 | 3.59 | 2.98 |
| Primates        | <i>Propithecus diadema edwardsi</i>    | AMNH 100633         | 10.93 | 9.00 | 7.50 | 7.30 | 5.20 |
| Primates        | <i>Propithecus verreauxi coquereli</i> | AMNH 208991         | 8.30  | 7.00 | 5.70 | 6.39 | 4.46 |
| Primates        | <i>Propithecus verreauxi verreauxi</i> | AMNH 170491         | 8.02  | 6.62 | 5.05 | 5.76 | 3.81 |
| Primates        | <i>Propithecus verreauxi verreauxi</i> | AMNH 170474         | 7.74  | 6.95 | 5.19 | 6.36 | 4.26 |
| Primates        | <i>Tarsius bancanus bancanus</i>       | AMNH 106754         | 3.36  | 2.38 | 1.78 | 2.67 | 2.41 |
| Primates        | <i>Tarsius bancanus bancanus</i>       | AMNH 106649         | 3.18  | 2.34 | 1.72 | 2.40 | 2.43 |
| Primates        | <i>Tarsius bancanus borneanus</i>      | AMNH 106010         | 3.27  | 2.27 | 1.93 | 2.91 | 2.63 |
| Primates        | <i>Tarsius spectrum</i>                | AMNH 109367         | 3.11  | 2.52 | 1.91 | 2.35 | 2.28 |
| Primates        | <i>Tarsius spectrum</i>                | AMNH 109369         | 3.11  | 2.42 | 2.04 | 2.30 | 2.50 |
| Primates        | <i>Tarsius spectrum</i>                | AMNH 109368         | 3.22  | 2.45 | 1.85 | 2.41 | 2.37 |
| Primates        | <i>Tarsius syrichta</i>                | AMNH 203296         | 3.20  | 2.38 | 1.83 | 2.64 | 2.38 |
| Primates        | <i>Tarsius syrichta</i>                | AMNH 203297         | 3.15  | 2.26 | 1.91 | 2.66 | 2.40 |
| Primates        | <i>Varecia variegata</i>               | AMNH 201384         | 7.93  | 9.23 | 5.58 | 6.80 | 4.75 |
| Primates        | <i>Varecia variegata variegata</i>     | AMNH 100512         | 8.44  | 8.56 | 5.39 | 7.19 | 5.06 |
| <b>Primates</b> | <b><i>Dryomomys szalayii</i></b>       | UM 41870            | 0.75  | 0.75 | 0.74 | 1.04 | 0.95 |
| <b>Primates</b> | <b><i>Ignacius clarkforkensis</i></b>  | UM 82606; 108210    | 2.50  | 2.53 | 2.50 | 2.35 | 2.19 |
| <b>Primates</b> | <b><i>Nannodectes gidleyi</i></b>      | AMNH 17379          | 2.80  | 2.95 | 2.65 | 3.00 | 3.10 |
| <b>Primates</b> | <b><i>Nannodectes intermedius</i></b>  | USNM 309902; 442229 | na    | 3.10 | 2.74 | 2.40 | 2.60 |
| <b>Primates</b> | <b><i>Plesiadapis cookei</i></b>       | UM 87990            | 5.62  | 6.61 | 5.06 | 5.31 | 4.63 |
| <b>Primates</b> | <b><i>Tinimomys graybulliensis</i></b> | USNM 461201         | 0.75  | 0.82 | 0.65 | 1.08 | 0.91 |
| Scandentia      | <i>Ptilocercus lowii</i>               | YPM MAM 010179      | na    | 1.44 | 1.09 | 2.42 | 1.59 |
| Scandentia      | <i>Tupaia sp.</i>                      | YPM MAM 010169      | 2.74  | 2.50 | 2.43 | 3.37 | 2.41 |
| Scandentia      | <i>Tupaia sp.</i>                      | YPM MAM 010518      | 2.93  | 2.59 | 2.48 | 3.27 | 2.23 |
| Scandentia      | <i>Tupaia sp.</i>                      | YPM MAM 010601      | 2.51  | 2.32 | 2.30 | 3.06 | 2.09 |
| Scandentia      | <i>Tupaia sp.</i>                      | YPM MAM 010602      | 2.83  | 2.28 | 2.40 | 3.28 | 2.33 |

aW = astragalar lateral tibial facet width; cW = calcaneal cuboid facet mediolateral width; cD = calcaneal cuboid facet dorsoplantar depth; tL = lower second molar maximum mesiodistal length; tW = lower second molar maximum buccolingual width. Fossil taxa in bold.

**Table S3.** Tooth and tarsal dimensions of *Purgatorius* from the Garbani Channel Fauna

| <b>Order</b> | <b>Taxon</b>       | <b>Catalogue Number</b> | <b>Element</b> | <b>aW</b> | <b>cW</b> | <b>cD</b> | <b>tL</b> | <b>tW</b> |
|--------------|--------------------|-------------------------|----------------|-----------|-----------|-----------|-----------|-----------|
| Primates     | <i>Purgatorius</i> | UCMP 107406             | m2             | na        | na        | na        | 2.11      | 1.67      |
| Primates     | <i>Purgatorius</i> | UCMP 111585             | m2             | na        | na        | na        | 1.99      | 1.66      |
| Primates     | <i>Purgatorius</i> | UCMP 111606             | m2             | na        | na        | na        | 2.00      | 1.71      |
| Primates     | <i>Purgatorius</i> | UCMP 129267             | m2             | na        | na        | na        | 1.94      | 1.49      |
| Primates     | <i>Purgatorius</i> | UCMP 129268             | m2             | na        | na        | na        | 2.04      | 1.68      |
| Primates     | <i>Purgatorius</i> | UCMP 130605             | m2             | na        | na        | na        | 1.84      | 1.54      |
| Primates     | <i>Purgatorius</i> | UCMP 157979             | m2             | na        | na        | na        | 1.97      | 1.68      |
| Primates     | <i>Purgatorius</i> | UCMP 189590             | m2             | na        | na        | na        | 1.84      | 1.66      |
| Primates     | <i>Purgatorius</i> | UCMP 223152             | m2             | na        | na        | na        | 1.96      | 1.61      |
| Primates     | <i>Purgatorius</i> | UCMP 223154             | m2             | na        | na        | na        | 1.98      | 1.66      |
| Primates     | <i>Purgatorius</i> | UCMP 223156             | m2             | na        | na        | na        | 2.18      | 1.58      |
| Primates     | <i>Purgatorius</i> | UCMP 197507             | astragalus     | 1.53      | na        | na        | na        | na        |
| Primates     | <i>Purgatorius</i> | UCMP 197509             | astragalus     | 1.52      | na        | na        | na        | na        |
| Primates     | <i>Purgatorius</i> | UCMP 153027             | calcaneus      | na        | 1.62      | 1.62      | na        | na        |
| Primates     | <i>Purgatorius</i> | UCMP 197515             | calcaneus      | na        | 1.64      | 1.57      | na        | na        |
| Primates     | <i>Purgatorius</i> | UCMP 197517             | calcaneus      | na        | 1.58      | 1.41      | na        | na        |

**Table S4.** Measurement data for principle component analysis of astragalus

| Higher taxon    | Taxon                               | Catalogue Number | 1     | 2     | 3    | 4    | 5     | 6     | 7     | 8    | 9      | 10    | 11   | 12   | 13   | 14   | 15   | 16   | 17    | 18   | GM   | 19  | 20 | 21  | 22  | 23  |
|-----------------|-------------------------------------|------------------|-------|-------|------|------|-------|-------|-------|------|--------|-------|------|------|------|------|------|------|-------|------|------|-----|----|-----|-----|-----|
| Adaploriculidae | <i>Deccanolestes hislopi</i>        | VPL/JU/NKIM/52   | 1.73  | 1.04  | 0.67 | 0.83 | 0.80  | 1.07  | 0.74  | 0.61 | 1.31   | 0.66  | 0.45 | 0.77 | 0.61 | 0.73 | 0.41 | 0.50 | 0.80  | 0.41 | 0.73 | 97  | 45 | 97  | 91  | 5   |
| Adaploriculidae | <i>Deccanolestes robustus</i>       | VPL/JU/NKIM/51   | 2.52  | 1.34  | 0.89 | 1.10 | 1.20  | 1.51  | 0.94  | 1.02 | 1.95   | 0.98  | 0.64 | 1.28 | 0.93 | 1.00 | 0.59 | 0.58 | 1.20  | 0.81 | 1.10 | 118 | 58 | 102 | 93  | -9  |
| Cimolestidae    | <i>Procerberus formicarum</i>       | AMNH 117454      | 6.78  | 3.39  | 3.33 | 2.60 | 3.74  | 5.17  | 3.72  | 2.57 | 4.32   | 3.39  | 1.78 | 2.31 | 1.91 | 2.04 | 2.04 | 0.92 | 3.67  | 2.26 | 2.98 | 84  | 27 | 103 | 125 | -10 |
| Condylarthra    | <i>Protungulatum donnae</i>         | AMNH 118260      | 6.72  | 4.02  | 2.68 | 2.66 | 3.59  | 4.01  | 3.52  | 2.42 | 4.78   | 3.05  | 1.78 | 3.15 | 2.23 | 2.64 | 1.85 | 0.99 | 4.28  | 2.33 | 3.06 | 96  | 38 | 107 | 108 | -5  |
| Condylarthra    | <i>Protungulatum donnae</i>         | AMNH 11878       | 6.83  | 4.53  | 2.21 | 2.58 | 3.43  | 3.91  | 3.64  | 2.66 | 4.99   | 3.87  | 1.86 | 2.81 | 2.00 | 2.81 | 2.20 | 1.43 | 4.14  | 2.60 | 3.15 | 98  | 40 | 92  | 111 | -11 |
| Dermoptera      | <i>Cynocephalus volans</i>          | USNM 144662      | 10.51 | 7.35  | 2.48 | 3.98 | 5.66  | 6.80  | 4.70  | 4.33 | 10.48  | 4.79  | 2.09 | 4.25 | 4.27 | 3.65 | 2.14 | 2.45 | 4.59  | 3.64 | 4.58 | 103 | 18 | 95  | 105 | 8   |
| Dermoptera      | <i>Cynocephalus volans</i>          | USNM 578084      | 10.84 | 9.18  | 1.67 | 3.78 | 6.24  | 7.19  | 5.52  | 4.39 | 10.74  | 5.12  | 2.02 | 3.65 | 3.96 | 3.88 | 2.64 | 2.94 | 5.38  | 3.89 | 4.77 | 108 | 13 | 92  | 112 | 7   |
| Dermoptera      | <i>Cynocephalus volans</i>          | USNM 317118      | 11.07 | 8.63  | 2.55 | 4.23 | 5.73  | 7.00  | 5.67  | 3.70 | 10.08  | 4.56  | 2.19 | 2.87 | 3.77 | 3.65 | 2.22 | 2.40 | 4.78  | 4.00 | 4.52 | 99  | 14 | 97  | 113 | 12  |
| Omomyoidea      | <i>Hemiacondon gracilis</i>         | AMNH 12613A      | 8.21  | 4.32  | 3.89 | 2.71 | 3.73  | 6.38  | 3.66  | 3.77 | 6.59   | 3.06  | 1.65 | 1.68 | 1.72 | 3.95 | 1.75 | 2.73 | 3.47  | 2.82 | 3.25 | 81  | 7  | 72  | 106 | -8  |
| Omomyoidea      | <i>Omomys carteri</i>               | UM 98648         | 6.66  | 3.17  | 3.44 | 2.39 | 3.35  | 4.03  | 2.61  | 2.66 | 4.26   | 2.72  | 1.45 | 1.07 | 1.43 | 2.74 | 1.32 | 1.48 | 2.91  | 2.27 | 2.50 | 74  | 6  | 68  | 99  | 2   |
| Omomyoidea      | <i>Omomys carteri</i>               | UM 38321         | 6.91  | 3.50  | 3.39 | 2.36 | 3.26  | 4.46  | 2.69  | 2.41 | 4.00   | 2.87  | 1.45 | 1.11 | 1.35 | 2.77 | 1.01 | 1.85 | 2.66  | 2.17 | 2.43 | 72  | 6  | 74  | 102 | -9  |
| Haplorhini      | <i>Cebuella pygmaea</i>             | SBU-C01          | 4.97  | 2.91  | 2.01 | 1.53 | 2.50  | 3.48  | 2.25  | 1.64 | 3.21   | 2.14  | 1.00 | 1.05 | 1.14 | 1.90 | 1.16 | 1.59 | 2.27  | 1.65 | 1.91 | 70  | 13 | 87  | 112 | -5  |
| Haplorhini      | <i>Cebus apella</i>                 | SBU-NCb04        | 18.47 | 11.82 | 6.66 | 6.51 | 10.94 | 14.61 | 7.68  | 6.72 | 14.72  | 8.46  | 4.24 | 4.46 | 3.21 | 7.77 | 4.03 | 6.53 | 7.95  | 6.12 | 7.42 | 78  | 8  | 85  | 117 | -16 |
| Haplorhini      | <i>Saguinus oedipus</i>             | SBU-NSg06        | 8.84  | 5.17  | 3.53 | 2.84 | 4.81  | 7.11  | 3.77  | 2.50 | 6.56   | 3.79  | 1.93 | 2.01 | 2.12 | 4.03 | 2.12 | 2.64 | 3.69  | 2.75 | 3.50 | 70  | 17 | 85  | 115 | -10 |
| Haplorhini      | <i>Saimiri sciureus</i>             | SBU-Nsm06        | 11.19 | 6.46  | 4.52 | 3.33 | 5.87  | 6.88  | 5.38  | 3.81 | 7.91   | 5.06  | 2.57 | 2.36 | 1.82 | 5.59 | 2.09 | 2.53 | 4.04  | 3.14 | 4.17 | 77  | 11 | 72  | 114 | -11 |
| Haplorhini      | <i>Tarsius syrichta carbonarius</i> | AMNH 203296      | 6.38  | 3.76  | 2.65 | 1.68 | 3.01  | 3.74  | 3.22  | 2.29 | 5.12   | 3.07  | 1.09 | 1.46 | 0.66 | 2.29 | 1.93 | 1.92 | 2.80  | 1.85 | 2.34 | 83  | 16 | 61  | 110 | 6   |
| Plesiadapiform  | <i>Carpolestes simpsoni</i>         | UM 101963        | 4.70  | 2.97  | 1.86 | 1.95 | 2.44  | 2.83  | 2.14  | 1.25 | 3.09   | 2.17  | 1.13 | 1.30 | 1.27 | 2.31 | 1.30 | 1.58 | 2.64  | 1.57 | 1.97 | 82  | 34 | 80  | 86  | 27  |
| Plesiadapiform  | <i>Dryomomys szalayi</i>            | UM 41870         | 1.79  | 1.16  | 0.74 | 0.76 | 1.10  | 1.10  | 0.73  | 0.63 | 1.40   | 0.87  | 0.44 | 0.66 | 0.38 | 0.62 | 0.35 | 0.39 | 0.98  | 0.43 | 0.73 | 105 | 56 | 112 | 86  | 15  |
| Plesiadapiform  | <i>Ignacius graybullianus</i>       | USNM 442235      | 4.57  | 2.88  | 1.71 | 1.80 | 2.54  | 2.85  | 2.20  | 1.46 | 2.78   | 1.94  | 1.21 | 1.28 | 0.94 | 1.91 | 0.98 | 1.32 | 2.64  | 1.43 | 1.86 | 80  | 38 | 88  | 89  | 22  |
| Plesiadapiform  | <i>Nannodectes gidleyi</i>          | AMNH 17379       | 6.84  | 5.02  | 2.37 | 2.43 | 3.33  | 3.66  | 2.92  | 1.99 | 4.63   | 3.25  | 1.57 | 2.11 | 1.53 | 2.43 | 1.95 | 2.46 | 3.86  | 2.03 | 2.72 | 78  | 27 | 112 | 93  | 17  |
| Plesiadapiform  | <i>Plesiadapis cookei</i>           | UM 87990         | 13.02 | 8.14  | 4.64 | 4.90 | 6.80  | 7.25  | 5.62  | 3.40 | 8.40   | 5.47  | 2.92 | 4.96 | 4.47 | 5.72 | 2.90 | 3.50 | 6.94  | 3.68 | 5.31 | 84  | 22 | 115 | 93  | 14  |
| Plesiadapiform  | <i>Plesiadapis rex</i>              | UM 94816         | 7.94  | 5.51  | 2.46 | 3.39 | 4.10  | 5.43  | 3.86  | 3.01 | 6.32   | 3.49  | 2.71 | 2.97 | 2.44 | 2.98 | 2.39 | 2.99 | 4.79  | 2.27 | 3.61 | 92  | 43 | 116 | 93  | 18  |
| Plesiadapiform  | <i>Plesiadapis tricuspidens</i>     | MNHN BR 14537    | 11.05 | 7.24  | 4.16 | 4.54 | 6.52  | 7.35  | 5.51  | 3.17 | 8.42   | 5.48  | 3.08 | 3.48 | 3.08 | 4.21 | 2.78 | 2.91 | 6.45  | 3.54 | 4.81 | 81  | 40 | 119 | 87  | 16  |
| Plesiadapiform  | <i>Plesiadapis tricuspidens</i>     | MNHN nn          | 9.97  | 7.47  | 3.00 | 4.07 | 5.82  | 6.75  | 4.89  | 4.24 | 7.75   | 4.95  | 2.92 | 3.20 | 3.06 | 3.91 | 2.81 | 2.46 | 5.35  | 3.58 | 4.56 | 89  | 35 | 116 | 91  | 21  |
| Plesiadapiform  | <i>Plesiadapis tricuspidens</i>     | MNHN R 5347      | 10.88 | 7.58  | 3.45 | 5.22 | 6.54  | 7.07  | 5.56  | 3.80 | 8.68   | 5.22  | 3.42 | 4.01 | 3.97 | 4.55 | 3.23 | 3.72 | 6.25  | 3.45 | 5.12 | 87  | 53 | 132 | 93  | 11  |
| Plesiadapiform  | <i>Plesiadapis tricuspidens</i>     | MNHN R 610       | 10.96 | 7.80  | 3.22 | 4.69 | 6.61  | 8.01  | 5.65  | 4.00 | 9.33   | 5.44  | 3.23 | 3.86 | 3.32 | 3.87 | 3.45 | 4.47 | 6.34  | 3.50 | 5.08 | 77  | 37 | 131 | 92  | 20  |
| Plesiadapiform  | <i>Purgatorius</i>                  | UCMP 197509      | 3.34  | 2.31  | 1.25 | 1.46 | 1.75  | 2.25  | 1.53  | 1.13 | 2.57   | 1.65  | 1.03 | 1.32 | 0.86 | 1.27 | 0.96 | 1.12 | 1.93  | 0.95 | 1.48 | 99  | 49 | 114 | 88  | 14  |
| Plesiadapiform  | <i>Purgatorius</i>                  | UCMP 197507      | 3.41  | 2.27  | 1.33 | 1.46 | 1.72  | 2.30  | 1.52  | 1.21 | 2.62   | 1.58  | 0.86 | 1.19 | 0.78 | 1.59 | 0.74 | 1.14 | 1.74  | 0.88 | 1.43 | 93  | 46 | 107 | 88  | 17  |
| Plesiadapiform  | <i>Tinimomys graybulliensis</i>     | USNM 461201      | 2.42  | 1.29  | 1.16 | 0.92 | 1.40  | 1.55  | 0.93  | 0.78 | 1.80   | 1.14  | 0.61 | 0.87 | 0.48 | 0.69 | 0.50 | 0.54 | 1.10  | 0.53 | 0.94 | 118 | 50 | 113 | 85  | 18  |
| Scandentia      | <i>Ptilocercus lowii</i>            | USNM 488067      | 4.28  | 1.96  | 2.17 | 1.31 | 2.03  | 2.71  | 1.49  | 1.32 | 3.34   | 1.58  | 0.96 | 0.72 | 1.08 | 1.61 | 0.99 | 1.08 | 1.65  | 1.14 | 1.55 | 95  | 36 | 123 | 90  | 7   |
| Scandentia      | <i>Ptilocercus lowii</i>            | USNM 488072      | 4.23  | 1.95  | 2.14 | 1.32 | 2.03  | 2.80  | 1.43  | 1.34 | 3.42   | 1.56  | 0.98 | 0.71 | 1.08 | 1.64 | 1.03 | 1.12 | 1.63  | 1.17 | 1.56 | 100 | 39 | 121 | 91  | 11  |
| Scandentia      | <i>Ptilocercus lowii</i>            | USNM 488069      | 4.36  | 2.07  | 2.17 | 1.39 | 2.11  | 2.81  | 1.44  | 1.36 | 3.55   | 1.47  | 0.92 | 0.78 | 0.87 | 1.60 | 1.00 | 1.17 | 1.74  | 1.17 | 1.55 | 101 | 32 | 126 | 93  | 5   |
| Scandentia      | <i>Tupaia belangeri</i>             | AMNH 113135      | 6.05  | 3.27  | 2.68 | 1.72 | 2.84  | 4.68  | 2.85  | 1.67 | 3.90   | 2.64  | 1.72 | 1.30 | 1.31 | 2.43 | 1.18 | 1.64 | 2.67  | 1.79 | 2.30 | 94  | -1 | 56  | 105 | -15 |
| Scandentia      | <i>Tupaia glis</i>                  | SBU coll.        | 6.06  | 3.69  | 2.20 | 1.67 | 2.59  | 4.02  | 3.09  | 1.70 | 3.59   | 2.47  | 1.67 | 0.99 | 1.48 | 2.47 | 1.02 | 1.69 | 2.79  | 1.69 | 2.21 | 72  | 6  | 87  | 105 | -9  |
| Scandentia      | <i>Urogale everetti</i>             | AMNH 203293      | 6.83  | 3.66  | 3.18 | 2.28 | 2.28  | 4.66  | 3.22  | 1.76 | 4.02   | 2.91  | 1.93 | 1.44 | 1.55 | 2.27 | 1.44 | 1.29 | 3.30  | 2.12 | 2.52 | 95  | -5 | 62  | 104 | 2   |
| Adapoidea       | <i>Leptadapis magnus</i>            | AMNH 127411      | 25.21 | 17.30 | 7.58 | 9.55 | 12.02 | 13.45 | 10.65 | 7.71 | 19.74  | 10.80 | 5.51 | 6.18 | 6.02 | 8.84 | 4.80 | 4.85 | 12.33 | 9.04 | 9.73 | 89  | 20 | 85  | 109 | 17  |
| Adapoidea       | <i>Notharctus tenebrosus</i>        | AMNH 11474       | 16.64 | 10.70 | 5.96 | 6.23 | 7.97  | 8.79  | 7.33  | 5.77 | 14.81  | 7.20  | 2.81 | 3.96 | 2.60 | 5.55 | 3.00 | 3.24 | 6.95  | 5.52 | 6.10 | 93  | 18 | 80  | 94  | 15  |
| Adapoidea       | <i>Adapis parisiensis</i>           | AMNH 111935      | 10.64 | 7.15  | 3.61 | 4.09 | 5.85  | 6.85  | 5.29  | 4.11 | 8.71   | 5.23  | 2.38 | 2.53 | 2.31 | 3.89 | 2.33 | 2.41 | 5.39  | 4.05 | 4.41 | 90  | 23 | 89  | 102 | 2   |
| Strepsirrhini   | <i>Cheirogaleus medius</i>          | DPC 0142         | 7.06  | 3.87  | 2.68 | 2.25 | 3.08  | 3.83  | 2.45  | 1.96 | 5.60   | 2.93  | 1.30 | 0.48 | 1.93 | 3.54 | 1.74 | 2.74 | 2.93  | 2.01 | 2.44 | 92  | 16 | 83  | 101 | 18  |
| Strepsirrhini   | <i>Eulemur fulvus</i>               | DPC 095          | 14.83 | 9.23  | 4.78 | 4.66 | 8.20  | 9.66  | 5.91  | 4.51 | 12.31  | 6.58  | 2.75 | 3.09 | 3.91 | 5.15 | 3.83 | 3.39 | 5.73  | 5.09 | 5.71 | 98  | 26 | 75  | 111 | -8  |
| Strepsirrhini   | <i>Galago senegalensis</i>          | AMNH 86502       | 7.90  | 4.41  | 3.43 | 2.33 | 4.15  | 5.82  | 2.90  | 3.03 | 5.57   | 3.09  | 1.54 | 1.92 | 0.56 | 3.91 | 1.86 | 2.49 | 3.10  | 2.23 | 2.82 | 75  | 32 | 89  | 107 | 21  |
| Strepsirrhini   | <i>Galago senegalensis</i>          | AMNH 83299       | 8.51  | 4.59  | 3.86 | 2.68 | 4.46  | 5.89  | 2.81  | 3.34 | 5.61   | 3.26  | 2.18 | 2.03 | 0.57 | 4.35 | 1.66 | 2.75 | 3.51  | 2.41 | 3.02 | 78  | 37 | 96  | 103 | 23  |
| Strepsirrhini   | <i>Loris tardigradus</i>            | HTB 750          | 6.59  | 4.69  | 1.91 | 2.34 | 2.79  | 4.55  | 2.98  | 1.53 | 4.63   | 2.25  | 1.31 | 1.74 | 1.54 | 2.32 | 1.62 | 2.23 | 3.53  | 1.80 | 2.47 | 84  | 15 | 79  | 100 | 17  |
| Strepsirrhini   | <i>Loris tardigradus</i>            | AMNH 150038      | 7.84  | 5.05  | 2.89 | 2.90 | 3.50  | 5.21  | 3.29  | 2.27 | 6.01</ |       |      |      |      |      |      |      |       |      |      |     |    |     |     |     |

**Table S5.** Measurement data for principle component analysis of calcaneus

| Higher taxon           | Taxon                                  | Catalogue Number | 1     | 2     | 3     | 4     | 5     | 6     | 7     | 8     | 9    | 10    | 11    | 12    | 13   | 14    | 15    | 16   | 17   | 18    | 19    | GM   | 20  | 21  | 22  | 23  | 24  | 25  |
|------------------------|----------------------------------------|------------------|-------|-------|-------|-------|-------|-------|-------|-------|------|-------|-------|-------|------|-------|-------|------|------|-------|-------|------|-----|-----|-----|-----|-----|-----|
| <b>Adaploriculidae</b> | <b><i>Decanolestes hislopi</i></b>     | VPL/JU/NKIM/52   | 2.52  | 1.74  | 0.78  | 1.12  | 0.91  | 0.64  | 0.77  | 1.25  | 0.54 | 1.14  | 0.64  | 0.85  | 0.50 | 0.69  | 0.38  | 0.48 | 0.64 | 0.74  | 0.73  | 0.87 | 142 | 61  | 166 | 86  | 104 | 32  |
| <b>Cimolestidae</b>    | <b><i>Procerberus formicarum</i></b>   | AMNH 117455      | 9.48  | 6.37  | 3.03  | 4.08  | 3.45  | 2.57  | 3.10  | 3.41  | 1.51 | 4.11  | 3.03  | 3.08  | 1.56 | 1.21  | 1.42  | 1.42 | 2.29 | 2.42  | 1.77  | 3.19 | 141 | 55  | 168 | 76  | 103 | 48  |
| <b>Cimolestidae</b>    | <b><i>Procerberus formicarum</i></b>   | AMNH 119802      | 9.61  | 6.42  | 3.29  | 4.06  | 3.06  | 3.03  | 2.95  | 3.56  | 1.96 | 4.45  | 2.60  | 3.17  | 1.46 | 1.44  | 0.86  | 1.26 | 2.28 | 2.34  | 1.54  | 3.25 | 147 | 40  | 167 | 77  | 107 | 43  |
| <b>Condylarthra</b>    | <b><i>Protungulatum donnae</i></b>     | AMNH 118060      | 11.93 | 8.95  | 2.89  | 4.72  | 3.45  | 3.41  | 3.28  | 3.75  | 1.50 | 5.09  | 3.89  | 3.18  | 1.98 | 1.74  | 1.74  | 1.46 | 2.89 | 2.43  | 2.67  | 3.68 | 147 | 50  | 175 | 72  | 122 | 19  |
| Dermoptera             | <i>Cynocephalus volans</i>             | USNM 144662      | 12.07 | 6.89  | 5.23  | 4.64  | 4.98  | 2.87  | 4.66  | 4.85  | 1.93 | 5.64  | 4.88  | 5.55  | 2.18 | 1.53  | 2.25  | 1.16 | 4.05 | 4.08  | 3.32  | 4.48 | 138 | 74  | 180 | 76  | 105 | 47  |
| Dermoptera             | <i>Cynocephalus volans</i>             | USNM 317118      | 14.69 | 7.46  | 7.00  | 5.05  | 5.90  | 4.16  | 4.99  | 5.51  | 2.57 | 6.24  | 5.66  | 5.68  | 2.16 | 2.35  | 2.48  | 1.00 | 3.32 | 4.67  | 3.74  | 5.14 | 142 | 70  | 166 | 76  | 106 | 37  |
| Dermoptera             | <i>Cynocephalus volans</i>             | USNM 578084      | 13.66 | 7.34  | 6.56  | 5.46  | 5.82  | 3.21  | 5.26  | 5.17  | 2.26 | 5.48  | 6.29  | 5.19  | 2.65 | 2.08  | 2.48  | 1.21 | 3.60 | 4.74  | 3.51  | 5.00 | 146 | 77  | 168 | 68  | 110 | 34  |
| <b>Omomyoidea</b>      | <b><i>Omomys carteri</i></b>           | UCM 69303        | 17.38 | 7.87  | 9.76  | 5.04  | 4.75  | 3.07  | 3.17  | 4.33  | 2.07 | 4.52  | 9.29  | 6.96  | 1.91 | 0.69  | 10.17 | 1.32 | 3.68 | 3.07  | 12.25 | 4.57 | 137 | 71  | 139 | 98  | 108 | 10  |
| <b>Omomyoidea</b>      | <b><i>Omomys carteri</i></b>           | UCM 69065        | 16.38 | 7.51  | 8.89  | 5.18  | 4.87  | 3.01  | 3.24  | 4.57  | 2.02 | 4.56  | 8.27  | 6.07  | 1.91 | 0.95  | 9.41  | 1.15 | 3.26 | 3.06  | 11.09 | 4.45 | 123 | 72  | 144 | 93  | 114 | 10  |
| <b>Omomyoidea</b>      | <b><i>Omomys carteri</i></b>           | UCM 68745        | 16.29 | 7.15  | 9.00  | 4.73  | 4.59  | 2.9   | 2.78  | 4.02  | 2.05 | 4.69  | 8.5   | 6.36  | 1.71 | 0.36  | 9.03  | 1.18 | 2.77 | 2.94  | 11.16 | 4.24 | 136 | 70  | 146 | 98  | 106 | 7.5 |
| Haplorhini             | <i>Cebuella pygmaea</i>                | AMNH 244101      | 7.15  | 3.94  | 3.42  | 2.85  | 2.12  | 1.82  | 2.18  | 2.84  | 1.2  | 2.88  | 2.86  | 2.97  | 0.84 | 0.71  | 3.3   | 0.66 | 2.15 | 1.83  | 4.32  | 2.41 | 129 | 58  | 165 | 86  | 105 | 13  |
| Haplorhini             | <i>Cebuella pygmaea</i>                | AMNH 244365      | 7.56  | 3.98  | 3.20  | 2.90  | 2.55  | 1.89  | 2.18  | 2.9   | 1.21 | 2.88  | 3.13  | 3.03  | 0.86 | 0.73  | 3.36  | 0.73 | 2    | 1.84  | 4.3   | 2.49 | 134 | 60  | 163 | 86  | 100 | 10  |
| Haplorhini             | <i>Cebuella pygmaea</i>                | SBU NC1          | 7.66  | 4.12  | 3.25  | 3.12  | 2.76  | 1.64  | 2.25  | 3.1   | 1.24 | 2.83  | 3.23  | 3.06  | 0.9  | 0.71  | 3.4   | 0.65 | 1.97 | 1.71  | 4.35  | 2.49 | 135 | 58  | 168 | 82  | 102 | 12  |
| Haplorhini             | <i>Cebus apella</i>                    | AMNH 133606      | 28.57 | 14.47 | 12.86 | 10.36 | 9.30  | 9.07  | 7.43  | 10.97 | 5.48 | 10.89 | 11.97 | 4.18  | 4.01 | 12.61 | 3.71  | 8.55 | 5.6  | 16.26 | 9.44  | 133  | 61  | 166 | 85  | 90  | 46  |     |
| Haplorhini             | <i>Cebus apella</i>                    | AMNH 133608      | 24.8  | 12.78 | 11.42 | 9.06  | 8.46  | 7.33  | 6.88  | 9.75  | 5.05 | 9     | 11.66 | 11.13 | 3.55 | 3.43  | 13.2  | 3.45 | 7.96 | 4.67  | 16.88 | 8.46 | 130 | 58  | 165 | 85  | 91  | 46  |
| Haplorhini             | <i>Cebus apella</i>                    | AMNH 133764      | 24.27 | 12.82 | 11.29 | 9.11  | 8.8   | 7.43  | 6.9   | 9.85  | 4.36 | 9.26  | 10.97 | 10.42 | 3.44 | 2.96  | 11.32 | 2.92 | 7.41 | 6.34  | 15.13 | 8.54 | 148 | 63  | 174 | 87  | 91  | 47  |
| Haplorhini             | <i>Saguinus mystax</i>                 | AMNH 188177      | 11.77 | 6.15  | 5.45  | 4.69  | 3.88  | 2.84  | 3.16  | 3.99  | 1.94 | 4.44  | 4.94  | 4.98  | 1.53 | 1     | 5.58  | 0.87 | 3.22 | 2.25  | 6.19  | 3.78 | 111 | 58  | 161 | 89  | 130 | 28  |
| Haplorhini             | <i>Saimiri boliviensis</i>             | AMNH 211613      | 17.11 | 9.18  | 7.89  | 6.27  | 5.64  | 4.34  | 4.84  | 6.07  | 2.59 | 6.01  | 7.65  | 7.76  | 2.78 | 1.53  | 8.2   | 1.22 | 5.11 | 2.99  | 9.14  | 5.45 | 104 | 62  | 151 | 87  | 122 | 40  |
| Haplorhini             | <i>Tarsius spectrum</i>                | AMNH 109369      | 27.11 | 5.91  | 18.84 | 3.61  | 3.27  | 3.31  | 3.24  | 3.58  | 1.14 | 3.15  | 20.02 | 2.09  | 1.25 | 0.46  | 21.31 | 0.75 | 2.07 | 2.48  | 22.34 | 3.91 | 141 | 82  | 160 | 87  | 100 | 37  |
| <b>Plesiadapiform</b>  | <b><i>Carolestes simpsoni</i></b>      | UM 101963        | 6.79  | 4.03  | 2.78  | 2.98  | 2.30  | 1.65  | 2.52  | 3.50  | 1.38 | 3.48  | 2.4   | 2.78  | 1.29 | 1.11  | 0.86  | 0.95 | 1.71 | 2.12  | 2.22  | 2.46 | 141 | 68  | 162 | 79  | 107 | 44  |
| <b>Plesiadapiform</b>  | <b><i>Dryomomys scalayi</i></b>        | UM 41870         | 3.32  | 2.20  | 1.12  | 1.42  | 1.08  | 0.80  | 1.03  | 1.51  | 0.62 | 1.48  | 1.00  | 1.30  | 0.72 | 0.67  | 0.49  | 0.68 | 0.84 | 0.72  | 1.10  | 1.09 | 129 | 67  | 166 | 80  | 103 | 35  |
| <b>Plesiadapiform</b>  | <b><i>Ignacius graybullianus</i></b>   | USNM 442240      | 7.28  | 4.80  | 2.46  | 3.08  | 2.26  | 1.91  | 2.75  | 3.67  | 1.30 | 3.19  | 2.20  | 2.52  | 1.46 | 0.94  | 1.16  | 1.07 | 2.12 | 2.00  | 2.86  | 2.52 | 125 | 59  | 165 | 79  | 109 | 42  |
| <b>Plesiadapiform</b>  | <b><i>Nannodectes gidleyi</i></b>      | AMNH 17379       | 10.43 | 6.48  | 3.49  | 4.10  | 3.84  | 2.84  | 3.20  | 4.60  | 1.85 | 4.53  | 3.60  | 3.54  | 2.07 | 1.37  | 3.26  | 1.13 | 2.03 | 2.45  | 3.92  | 3.43 | 145 | 69  | 175 | 81  | 105 | 20  |
| <b>Plesiadapiform</b>  | <b><i>Phenacolemus simonsi</i></b>     | USNM 442238      | 6.65  | 4.26  | 2.38  | 2.54  | 1.93  | 1.37  | 2.21  | 3.08  | 1.10 | 2.72  | 2.03  | 2.25  | 1.37 | 1.11  | 1.19  | 0.74 | 1.68 | 1.53  | 2.67  | 2.08 | 124 | 63  | 171 | 78  | 99  | 44  |
| <b>Plesiadapiform</b>  | <b><i>Plesiadapis churchilli</i></b>   | UM nn            | 12.30 | 7.94  | 4.09  | 4.67  | 4.39  | 2.96  | 4.00  | 4.93  | 2.14 | 5.10  | 4.61  | 4.29  | 2.67 | 2.18  | 3.01  | 1.79 | 2.52 | 3.30  | 4.25  | 4.07 | 152 | 75  | 173 | 75  | 104 | 25  |
| <b>Plesiadapiform</b>  | <b><i>Plesiadapis cooki</i></b>        | UM 87990         | 18.80 | 11.80 | 6.50  | 7.50  | 6.70  | 5.50  | 6.80  | 7.90  | 3.31 | 7.90  | 8.75  | 7.00  | 3.65 | 3.34  | 4.67  | 2.19 | 5.14 | 5.19  | 7.63  | 6.81 | 148 | 73  | 162 | 75  | 103 | 32  |
| <b>Plesiadapiform</b>  | <b><i>Plesiadapis tricuspidens</i></b> | MNHN R 414       | 18.39 | 12.22 | 6.10  | 7.40  | 6.57  | 5.20  | 6.43  | 7.78  | 3.25 | 7.53  | 6.81  | 6.43  | 3.90 | 3.11  | 4.20  | 2.34 | 4.67 | 5.26  | 6.35  | 6.44 | 146 | 68  | 172 | 73  | 94  | 21  |
| <b>Plesiadapiform</b>  | <b><i>Plesiadapis tricuspidens</i></b> | MNHN R 611       | 16.99 | 10.88 | 5.68  | 6.41  | 5.46  | 4.55  | 5.66  | 7.05  | 2.91 | 7.45  | 5.52  | 5.43  | 3.11 | 3.00  | 4.70  | 2.11 | 4.23 | 4.33  | 6.36  | 5.66 | 150 | 73  | 166 | 73  | 100 | 21  |
| <b>Plesiadapiform</b>  | <b><i>Purgatorius</i></b>              | UCMP 197517      | 5.30  | 3.87  | 1.46  | 2.04  | 1.47  | 1.40  | 1.69  | 2.22  | 0.78 | 2.15  | 1.56  | 1.79  | 0.81 | 1.00  | 0.75  | 0.78 | 1.41 | 1.33  | 1.69  | 1.68 | 129 | 64  | 164 | 71  | 107 | 44  |
| <b>Plesiadapiform</b>  | <b><i>Tinimomys graybullianus</i></b>  | USNM 461201      | 3.39  | 2.36  | 1.06  | 1.30  | 1.06  | 0.87  | 1.08  | 1.56  | 0.68 | 1.55  | 0.92  | 1.27  | 0.54 | 0.65  | 0.50  | 0.65 | 0.90 | 0.79  | 0.93  | 1.12 | 132 | 63  | 165 | 81  | 106 | 30  |
| Scandentia             | <i>Ptilocercus lowii</i>               | YPM 6873         | 5.26  | 3.11  | 2.11  | 1.78  | 1.66  | 1.21  | 1.60  | 2.21  | 0.70 | 2.45  | 2.04  | 1.68  | 0.80 | 0.80  | 2.44  | 0.85 | 1.32 | 1.12  | 2.77  | 1.66 | 126 | 84  | 160 | 78  | 97  | 50  |
| Scandentia             | <i>Tupaia belangeri</i>                | AMNH 113135      | 9.27  | 5.33  | 3.62  | 3.56  | 3.01  | 2.22  | 2.62  | 3.28  | 1.29 | 4.31  | 2.88  | 3.08  | 1.35 | 1.26  | 3.58  | 0.99 | 2.44 | 1.77  | 4.83  | 2.89 | 123 | 53  | 156 | 85  | 91  | 34  |
| Scandentia             | <i>Tupaia sp.</i>                      | SBU coll.        | 9.02  | 5.21  | 3.67  | 3.27  | 2.79  | 2.14  | 2.46  | 3.87  | 1.57 | 4.03  | 2.81  | 2.98  | 1.36 | 0.74  | 3.90  | 0.53 | 1.59 | 1.99  | 4.88  | 2.75 | 141 | 61  | 158 | 83  | 89  | 9   |
| Scandentia             | <i>Urogale everetti</i>                | AMNH 203293      | 10.22 | 5.72  | 4.14  | 3.79  | 3.12  | 2.55  | 2.96  | 3.97  | 1.51 | 4.69  | 3.93  | 3.84  | 1.64 | 1.72  | 3.41  | 0.83 | 2.79 | 2.21  | 4.82  | 3.31 | 125 | 60  | 150 | 82  | 91  | 35  |
| <b>Adapoidea</b>       | <b><i>Adapis parisiensis</i></b>       | AMNH 111937      | 19.50 | 12.73 | 6.92  | 6.52  | 5.91  | 5.05  | 5.60  | 7.55  | 3.53 | 7.32  | 5.39  | 7.09  | 2.99 | 0.44  | 8.47  | 1.28 | 5.74 | 3.72  | 10.12 | 6.03 | 167 | 76  | 180 | 102 | 104 | 42  |
| <b>Adapoidea</b>       | <b><i>Adapis parisiensis</i></b>       | NMB QE741        | 17.13 | 11.99 | 4.94  | 6.33  | 6.81  | 4.48  | 5.46  | 5.39  | 2.21 | 6.99  | 5.38  | 6.99  | 3.08 | 1.13  | 8.86  | 1.38 | 5.28 | 4.57  | 10.07 | 5.70 | 143 | 84  | 154 | 89  | 111 | 17  |
| <b>Adapoidea</b>       | <b><i>Notharctus tenebrosus</i></b>    | AMNH 131945      | 25.55 | 13.99 | 11.4  | 10.37 | 9.85  | 6.32  | 7.46  | 8.66  | 3.87 | 9.44  | 10.29 | 10.75 | 3.93 | 1.81  | 10.95 | 2.24 | 7.33 | 6.02  | 12.58 | 8.53 | 147 | 82  | 162 | 91  | 104 | 23  |
| <b>Adapoidea</b>       | <b><i>Notharctus tenebrosus</i></b>    | AMNH 131766      | 23.56 | 13.56 | 10.17 | 8.37  | 8.03  | 6.21  | 7.11  | 8.23  | 2.91 | 8.99  | 8.75  | 9.02  | 3.53 | 1.99  | 9.32  | 2.29 | 6.42 | 5.07  | 11.62 | 7.44 | 145 | 81  | 163 | 92  | 97  | 17  |
| <b>Adapoidea</b>       | <b><i>Notharctus tenebrosus</i></b>    | AMNH 11474       | 23.07 | 13.19 | 9.89  | 8.60  | 8.32  | 5.23  | 6.87  | 8.78  | 3.12 | 7.96  | 9.49  | 8.63  | 3.68 | 1.83  | 9.42  | 1.86 | 6.34 | 5.05  | 11.42 | 7.33 | 158 | 82  | 160 | 90  | 94  | 16  |
| <b>Adapoidea</b>       | <b><i>Leptadapis magnus</i></b>        | NHMB QF 421      | 33.2  | 23.07 | 9.52  | 11.59 | 11.53 | 11.98 | 10.09 | 12.66 | 3.98 | 13.24 | 9.41  | 11.99 | 4.26 | 3.17  | 14.35 | 3.97 | 9.76 | 7.29  | 19.99 |      |     |     |     |     |     |     |

**Table S6.** Principle component analysis results for astragalus

| Variance distribution |            |       | Component loadings |       |       |       |       |       |       |       |       |  |
|-----------------------|------------|-------|--------------------|-------|-------|-------|-------|-------|-------|-------|-------|--|
| PC                    | Eigenvalue | %var  | Variable           | PC- 1 | PC-2  | PC-3  | PC- 4 | PC-5  | PC-6  | PC-7  | PC-8  |  |
| 1                     | 6.03       | 26.21 | 1                  | 0.31  | 0.20  | 0.00  | 0.08  | -0.11 | -0.11 | 0.35  | 0.04  |  |
| 2                     | 3.16       | 13.73 | 2                  | 0.02  | -0.20 | 0.00  | 0.53  | 0.12  | -0.17 | -0.04 | -0.23 |  |
| 3                     | 2.57       | 11.20 | 3                  | 0.21  | 0.33  | -0.12 | -0.26 | -0.05 | -0.04 | 0.29  | 0.21  |  |
| 4                     | 2.32       | 10.07 | 4                  | -0.24 | 0.16  | -0.01 | 0.11  | -0.03 | -0.48 | 0.03  | 0.23  |  |
| 5                     | 1.56       | 6.79  | 5                  | 0.12  | 0.22  | 0.18  | 0.02  | 0.49  | 0.06  | -0.09 | -0.36 |  |
| 6                     | 1.40       | 6.09  | 6                  | 0.28  | 0.17  | -0.07 | -0.10 | -0.14 | 0.01  | -0.19 | -0.27 |  |
| 7                     | 1.06       | 4.63  | 7                  | 0.11  | -0.36 | -0.31 | 0.02  | 0.13  | -0.08 | 0.06  | -0.07 |  |
| 8                     | 0.90       | 3.90  | 8                  | 0.16  | 0.12  | 0.25  | -0.19 | 0.26  | -0.14 | -0.32 | 0.33  |  |
| 9                     | 0.77       | 3.34  | 9                  | 0.13  | 0.05  | 0.48  | 0.25  | -0.02 | 0.07  | 0.21  | -0.08 |  |
| 10                    | 0.59       | 2.57  | 10                 | 0.13  | -0.09 | -0.14 | -0.02 | 0.56  | 0.13  | 0.39  | -0.02 |  |
| 11                    | 0.54       | 2.34  | 11                 | -0.09 | 0.17  | -0.36 | -0.30 | -0.03 | -0.01 | 0.14  | -0.31 |  |
| 12                    | 0.40       | 1.73  | 12                 | -0.32 | -0.07 | 0.05  | -0.10 | 0.12  | -0.01 | -0.26 | 0.16  |  |
| 13                    | 0.37       | 1.60  | 13                 | -0.21 | -0.22 | 0.16  | -0.05 | -0.40 | -0.03 | 0.12  | -0.25 |  |
| 14                    | 0.31       | 1.35  | 14                 | 0.25  | 0.27  | -0.08 | 0.06  | -0.14 | -0.10 | -0.19 | 0.05  |  |
| 15                    | 0.26       | 1.13  | 15                 | -0.01 | 0.05  | -0.06 | 0.21  | -0.09 | 0.72  | 0.05  | 0.32  |  |
| 16                    | 0.24       | 1.05  | 16                 | 0.13  | 0.26  | -0.13 | 0.37  | -0.23 | 0.17  | -0.17 | -0.10 |  |
| 17                    | 0.16       | 0.68  | 17                 | -0.18 | -0.06 | -0.44 | 0.18  | 0.07  | 0.00  | 0.08  | 0.23  |  |
| 18                    | 0.13       | 0.58  | 18                 | 0.27  | -0.23 | 0.11  | 0.08  | -0.02 | -0.13 | 0.02  | 0.28  |  |
| 19                    | 0.10       | 0.44  | 19                 | -0.20 | -0.01 | 0.38  | -0.09 | -0.04 | 0.03  | 0.42  | 0.04  |  |
| 20                    | 0.06       | 0.26  | 20                 | -0.31 | 0.26  | 0.08  | -0.02 | 0.14  | 0.16  | -0.10 | 0.12  |  |
| 21                    | 0.05       | 0.20  | 21                 | -0.29 | 0.19  | 0.03  | -0.04 | 0.10  | 0.15  | -0.09 | -0.28 |  |
| 22                    | 0.02       | 0.08  | 22                 | 0.24  | -0.33 | 0.06  | -0.13 | 0.04  | 0.17  | -0.26 | 0.00  |  |
| 23                    | 0.01       | 0.03  | 23                 | -0.15 | 0.23  | -0.07 | 0.40  | 0.16  | -0.15 | 0.02  | 0.04  |  |

**Table S7.** Principle component analysis results for calcaneus

| Variance distribution |            |       | Component loadings |       |       |       |       |       |       |       |       |  |
|-----------------------|------------|-------|--------------------|-------|-------|-------|-------|-------|-------|-------|-------|--|
| PC                    | Eigenvalue | %var  | Variable           | PC- 1 | PC-2  | PC-3  | PC- 4 | PC-5  | PC-6  | PC-7  | PC-8  |  |
| 1                     | 8.99       | 35.96 | 1                  | 0.24  | -0.07 | 0.30  | -0.06 | -0.23 | -0.04 | 0.20  | 0.12  |  |
| 2                     | 3.02       | 12.08 | 2                  | -0.15 | -0.10 | 0.39  | 0.27  | -0.30 | 0.08  | -0.05 | 0.12  |  |
| 3                     | 2.29       | 9.17  | 3                  | 0.29  | 0.03  | -0.03 | -0.24 | 0.02  | -0.11 | 0.19  | 0.04  |  |
| 4                     | 1.75       | 7.01  | 4                  | -0.05 | 0.14  | 0.44  | -0.09 | -0.25 | -0.19 | -0.20 | -0.16 |  |
| 5                     | 1.64       | 6.55  | 5                  | -0.02 | -0.26 | -0.36 | 0.16  | -0.26 | -0.12 | -0.01 | -0.37 |  |
| 6                     | 1.32       | 5.28  | 6                  | 0.00  | -0.37 | 0.08  | 0.32  | 0.18  | 0.22  | -0.12 | 0.42  |  |
| 7                     | 1.26       | 5.05  | 7                  | -0.19 | 0.36  | -0.01 | 0.28  | 0.11  | -0.10 | 0.04  | -0.11 |  |
| 8                     | 0.92       | 3.69  | 8                  | -0.13 | 0.30  | 0.25  | -0.09 | 0.23  | 0.23  | 0.31  | -0.18 |  |
| 9                     | 0.76       | 3.05  | 9                  | -0.16 | 0.06  | 0.00  | -0.54 | 0.08  | 0.35  | 0.02  | 0.06  |  |
| 10                    | 0.55       | 2.21  | 10                 | -0.23 | -0.17 | 0.20  | 0.10  | -0.07 | 0.02  | 0.15  | -0.24 |  |
| 11                    | 0.54       | 2.15  | 11                 | 0.30  | 0.01  | -0.04 | -0.11 | 0.02  | -0.19 | 0.22  | 0.16  |  |
| 12                    | 0.42       | 1.67  | 12                 | 0.29  | 0.08  | 0.06  | -0.06 | 0.21  | -0.10 | 0.07  | 0.10  |  |
| 13                    | 0.36       | 1.44  | 13                 | -0.17 | 0.20  | 0.19  | 0.15  | -0.04 | -0.11 | 0.40  | 0.12  |  |
| 14                    | 0.31       | 1.26  | 14                 | -0.28 | -0.08 | 0.05  | -0.18 | 0.05  | -0.10 | 0.11  | 0.01  |  |
| 15                    | 0.22       | 0.89  | 15                 | 0.31  | 0.01  | 0.08  | 0.11  | 0.04  | 0.07  | 0.08  | -0.10 |  |
| 16                    | 0.16       | 0.63  | 16                 | -0.21 | -0.19 | 0.23  | -0.04 | 0.06  | 0.03  | 0.13  | -0.03 |  |
| 17                    | 0.13       | 0.53  | 17                 | 0.13  | 0.24  | 0.13  | 0.19  | 0.26  | 0.05  | -0.48 | -0.21 |  |
| 18                    | 0.11       | 0.42  | 18                 | -0.18 | 0.21  | -0.33 | -0.02 | -0.19 | -0.21 | 0.13  | 0.07  |  |
| 19                    | 0.08       | 0.33  | 19                 | 0.31  | 0.01  | 0.12  | 0.06  | 0.05  | 0.11  | 0.12  | -0.15 |  |
| 20                    | 0.06       | 0.25  | 20                 | -0.05 | 0.23  | -0.19 | 0.11  | -0.28 | 0.53  | 0.01  | 0.38  |  |
| 21                    | 0.04       | 0.17  | 21                 | 0.15  | 0.29  | -0.11 | 0.42  | 0.01  | 0.06  | 0.28  | -0.01 |  |
| 22                    | 0.03       | 0.12  | 22                 | -0.20 | 0.27  | -0.10 | -0.08 | 0.11  | 0.08  | -0.18 | -0.04 |  |
| 23                    | 0.01       | 0.04  | 23                 | 0.24  | 0.02  | 0.07  | -0.06 | -0.09 | 0.37  | -0.10 | -0.26 |  |
| 24                    | 0.01       | 0.03  | 24                 | 0.06  | 0.28  | 0.15  | -0.09 | -0.15 | -0.33 | -0.35 | 0.38  |  |
| 25                    | 0.01       | 0.02  | 25                 | -0.12 | -0.14 | 0.01  | 0.10  | 0.59  | -0.15 | 0.02  | 0.15  |  |

**Table S8.** Modified character matrix of (6) in TNT format. See (6-8) for character descriptions and states. All modifications in bold>.

xread 'Purgatorius analysis modified Goswami 2011'  
415 85

Nanolestes

000?0?0?????0?1?0?000000?00000?00000001000?000000000000100?0000?01020110[01]0  
0000000?000?0?0?????0?0?000000001000010?0??0?0020?0001????0020000?1?02000?00  
????????????????????????????????????????????????????????????????????????????????  
????????????????????????????????????????????????????????????????????????????????  
????????????????????????????????????????????????????????????????????????????????  
????????????????????????????????????????????????????????????????????????????????

Peramus

000[03]0??[012]?????????0?000101??0?10000000000100000000000011000110000000020000  
0101000000?000?0?0?????0?00?00000000100000100??0002[12]01011110?100200010?10  
100001??????0????????????????????????????????????????????????????????????????  
????????????????????????????????????????????????????????????????????????????????  
????????????????????????????????????????????????????????????????????????????????  
????

Vincelestes

003000110000000000000000010?300??0000000001????00000?001010000102001002210  
1100100000?01000000?0211001000000300100100??01032110011201100001011010201?01  
100000[01]00000000?0000100000000000000000000000000000000000000000000000000  
000001?00?000000?00000000?0000000000000?00000000000000000000000000000000?0  
000000??0?000000010000000000000?0200?000000?000000000000000000000000?00?00000?00  
000000000000100000000?????

Kielantherium

000?????????????0????????1????????????????000?????????0000111011200022[01]11000  
00111100?02000000?0?1??02000000110010100??01[01]?101????01?????????????010????  
????????????????????????????????????????????????????????????????????????????????  
????????????????????????????????????????????????????????????????????????????????  
????????????????????????????????????????????????????????????????????????????????

Deltatheridium

00100011000000000?0?01010101210010?00000000000101?000000000010111010000022111  
00101011122012000000?01110021000001100101110?001013010011100001100010110001?1  
111100001000?0010?00100000100?0000001?010000000000??10??????01????????1121??  
?????????????1?[01]01100????1??10[02]?0?20111?0202110000?0?0002?2000001000?0101  
??????1?0??012??01?0?0????????????????????????????????????????????????????????  
00??00?0???????

Mayulestes

00100000000000000000101010?2?0100?0000000000100??00000000010111010020122122  
10101111122012110000?00110001101011130113110001001301?0??0????????????00011??1  
111011100001010?001000001010001110100000000000?000000?0010?00??0?110000111100  
10100?011110?1010011100?0001000101?1?201110011?10000011100002?2100001000?01110  
00??0?1000?0?????????201100100????????1100111000110000??1000110010?00000?0100110  
?0010001100000???????

Pucadelphys

00100000000000000000101010?2?0100?00000000000101??000000000010111010020121122  
10110111122022110100?00110000101111301231200010013010021100011100011110001?1  
111100011000000110001000001010??11110000000000000000000001010?00?2011000?01120  
??1?100?111110?101001110010001000101?1?201110010210000010100002?2100000000?0111  
000??0?1000?0120?01??2011000000100??110010100011000??00000110000?0000??0?0?11  
00001000110000002111??

Acristatherium

000[01]00110000020410001001010?0?10010000000000000010000000000011111011000000  
01100000000100?12000000??0?1??00000100?1?0111?100000??010001?01??????001??0??  
??0000011010?001001001100??????????????01000010?0??????1?02?00??????01100?1[01]?  
????????????????0001?1????????????????????????????????????????????????????????  
????????????????01????????????????????????????????????????????????????????????  
????????

Eomaia

0001000000000?000?000001010?0?100101000101????010010010?00?100[02]10?1?0?002?[0  
1]0100?00??1111012??00?0?001?1010?010?01?02??01?0000021010111201100200010010200  
10101100011?0?0?010?100?1??0?????????????0?00001?????????????????????0?0?0??????  
?????????????????1????0?????????????11????????????????????????????????????????  
????????????????????????0????0?0?00??110?000?0?0??1?0?111?0??????11?0?0??10?00????  
??????

Prokennalestes

000?00?0??????????0?0??00??0?1????10001[01]1000000000[01]00[01]000[01]0100[12]1001  
10001020010000001111012000000?0010000000100110021111000000110101112011002000  
10?100001010????011?1????????????????????????????????0?0?0????????????????????  
1[01]????????????????????????????????10000?00111?0001110000??1100001000000?00?00  
0?????????1?00??02??11?0????????????????????????????????????????????????????  
??????????????????

Murtoilestes

00????????????????????????????????????????????????????????????0111?21000102111000000  
11112012000000?0?1?0000101?01110211110000????????????????????????????????????  
????????????????????????????????????????????????????????????????????????????  
????????????????????????????????????????????????????????????????????????????  
??????????????????????????????????????????????????????????????????????????





Gallolestes

00????????????????????????????????????????????????????????????0012?????10?????????????????????????  
?221?2110?1[12]00??1?0000021001302231200010?2????????????????????????????????????????  
????????????????????????????????????????????????????????????????????????????????????????  
????????????????????????????????????????????????????????????????????????????????????????  
????????????????????????????????????????????????????????????????????????????????????????

Parazhelestes

000?????????????0?0?00?????0[01]0?0?1????1000111000010010010021?0?10012212121002221  
111021111221221112220000100000002111121223020001001201???1201?????????????????1?121  
????????????????????????????????????????????????????????????????????????????????????????  
????????????????????????????????????????????????????????????????????????????????????????  
????????????????????????????????????????????????????????????????????????????????????????  
?00?020?111?0?0????????????????????????????????????????????????????????????????????????  
?????????

Aspanlestes

000?0??[012]?????????????????????????????????0?1?1?01??011111001000001002100110022212121002202  
11110211112212211022200001??000?0111112122302000100[12]101??11201?????????????????1  
?121????????????????????????????????????????????????????????????????????????????????????  
????????????????????????????????????????????????????????????????????????????????????????  
????????????????????????????????????????????????????????????????????????????????????????  
?????00?020?111?0?0????????????????????????????????????????????????????????????????????  
?????????????

Zhelestes

00010????????????????????????01010?0?1?101100011111?010010010021??10022212121002[12]221  
111021[01]11??22110[12][12]2000010000000111112122302000100120?0?1120?1002000100  
1??1?121?????11????????????????????????????????????????????????????????????????????  
????????????????????????????????????????????????????????????????????????????????????  
????????????????????????????????????????????????????????????????????????????????????  
????????????????00?020?111?0?0????????????????????????????????????????????????????  
0110011100???????

Paranyctoides

000?0?????????????????????0?????11?0?1????1[01]001[12]2000?0001010000[01]001100111011010[0  
2]22[01]1111100111112112111111000?1??00000100113122112000100[13]201??11?0????????  
?????????1?1????????????????????????????????????????????????????????????????????  
????????????????????????????????????????????????????????????????????????????????  
????????????????????????????????????????????????????????????????????????????????  
????????????????????????????????????????????????????????????????????????????????  
?????????

Eozhelestes

000????0?????????????0?????11?0?0????????????????????000[01]?1?????????1?0????????????????  
????????????????????????????000001001110223020001?0?2????????????????????????0[01]0????????  
????????????????????????????????????????????????????????????????????????????????  
????????????????????????????????????????????????????????????????????????????????  
????????????????????????????????????????????????????????????????????????????????

Cimolestes

001[03]00?1?????021?001001010?1?1?10?10012[01][01]0000010??000000000100110010210  
022001011001111221120101[01][01]000010000000001110211120[01]00001[12]0100112001  
0????000?00[01]01?121????11[01]?10??0??01?110??????2010??01?????????????????10?  
????????????????????????????????????????????????????????????????????????????????  
????????????????????????????????????????????????????????????????001????????????????  
????????????????00000??

Maelestes

000[03]00?1?????0?100?1?0[01]010?0?10101100110211000111100000001010022212021002  
100101100101100?12010111000010000000211111021212100000230100212011002000010200  
01?1??11001100??0??10??1000??1102101100100001110110000001?[01]000??0?11??  
1111?0112120??[23]??1100?011001000300010000?01111002021100000001001[12]?[12]001  
00011111[12]00[01]100?0?00??1002111110[03]01100010??????000?1000011100?????????  
????????01100??11?0????????????????

Batodon

001??????????????0????01??1?1????100?112000?010??000110001100221?10210021211011  
0011112211201011100001000000010111[12]02121[12]00000022?1????????????????0001??  
????????????????????????????????????????????????????????????????????????????????  
????????????????????????????????????????????????????????????????????????????????  
????????????????????????????????????????????????????????????????????????????????

Bulaklestes

001??????????????0?0??00??1?1????1000??????000??000100001100112111210022[02][01]  
101100111112112001100??001?0000?010011102112100000002?1?????1??????????0001??2  
1????????????????????????????????????????????????????????????????????????????????  
????????????????????????????????????????????????????????????????????????????????  
????????????????????????????????????????????????????????????????????????????????

Daulestes

001??????????????0????00??1?1????10001120000000??000101011100111[01]10000022001  
011001111121120001[01][01]000?1??000?02001110211?10000?0?2??????1?????????????  
????????1????????????????????????????????????????????????????????????????????????  
????????????????????????????????????????????????????????????????????????????????  
????????????????????????????????????????????????????????????????????????????????

Uchkudukodon

001[03]00?[01]?????[01]??0?000?0000101????10001020000??0??000?0101?1001101110000  
22001011001111121120001[01][01]000?100000002001110211210000001[23]01011120110020  
0010010201?121??0?011000?1110?100111000??0[01]0210110?1000011001[013]?00000?02?  
?010?00210??1111??1?00?021[23]00?1?00?0111012?1?0001000000011100?1?1?0000?????  
1????00????????00?0?000?????????0?100????????????????????????????????????  
????????????????????????????????

Kennalestes

001000[012]1?00001000?0?00000000101000?10011121100001??000001010100212021200022  
001011001111121120011120000100000001011110211110000001201002120010020000??1000  
1?1211100011010?0?10?101111000??0000101100?0000110?10000000?2??10100??00011  
11?01?2?20?11300?1000?01110121?3000101?000111100?1?10000000?1?11??[01]0010021110  
1100110?1?00000?00211112??20?110?????????????????????????????????????????????????  
????????????????????????

Asioryctes

00100000000001000?000000000?1?1000?20011220000001??100101010100210010210022001  
0110011111[02]112001100??00100000002011110211110000000101002120010020001001000  
1?1211100011010?0010?1001110000000??010110000010110?10000000??2??010100[02]1000  
01111?0111020011300?1000101110121?3000101?00011110001?10000000?1111??[01]001002  
1110110011001?00000?0?????2??10111001101????????????????????000????????????0011?  
0?11111?00??1000000?0???????

Ukhaatherium

001000000000010000000001010?1?1001?20011220000001??100101010100210010210022001  
01100111110112001100??001000000020?11102111100000002010021200100200010010001??  
21110001101000010?1011110000000??01011000001011?01?0??00??02??01010??1?0001111?  
01110200?1?00?100010111012103000101?000111100?1?10000000?1?11[01]1[01]001002111?  
11000100110?0001002??12??2011????????????100010000011?00?0?00??01?00?11?0011001  
112100001010200?220?????0?

Deccanolestes\_hislopi

001?0[01]????????????????011?1?0??010011030000001001011211001101110100000220[0  
1]1[01]010011002[02]11211[12][01]00??00100000[01]00[01]01111[12]1211000001101011??  
????????????????????????????????????????????????????????????????????????????????  
????????????????????????????????????????????????????????????????????????????????  
????????????????????????????????????????????????????????????????00011????????????????0220011011100  
0201101111011110111

Deccanolestes\_cf\_hislopi

00????????????????????????????????????????????????????????????0[12][12][12]0[01]0000022  
0[01]11010011002[02]1[12]2111[01]00??00100000000101111112110000????????????????  
????????????????????????????????????????????????????????????????????????????????  
????????????????????????????????????????????????????????????????????????????????  
????????????????????????????????????????????????????????????????????????????????  
?????????

Deccanolestes\_robustus

00????????????????????????????????????????????????????????????0111000100022011101001  
10012012112[01]00??0?1?000000001111112110000????????????????????????????????  
????????????????????????????????????????????????????????????????????????????????  
????????????????????????????????????????????????????????????????????????????????  
????????????????????????????????????????????????????????????????????????????????





Protungulatum

001?????????????????01010?1?2????10112[01]11100010??10011000111022102021002222[  
12]11102111211022102222000011000[01]001101111[12]1312000100[12][12]01002120010020  
1001020001?121?????????????????????????????????????????????????????????????????  
1????????????????????????????????????00000?011?1?001?10???0??211?0[12]?[12]001002101  
011?????????1?00?0201112???0????????????????????????000011????????????????????022100?01  
110002110111012000000?0

Oxyprimus

001????????????????????????????????1????????????????????????10012000111022102021002222[12]11  
10211121102210222200001?0000001101111[12]121200010[01]?1010021200100???00??2????  
????????????????????????????????????????????????????????????????????????????????  
????????????????????????????????????????????????????????????????????????????????  
????????????????????????????????????????????????????????????????????????????????  
????????????????????????????????????????????????????????????????????????????????

Vulpavus

00[12]00021000000000000001010?[12]?0111?00011230000011??00000000?12022002021002  
222111102111100?22101111[01]10011001100210111122131000010[12][12]0?0011?00?00000  
01112??01?1??11[01]011001[12]010110001111001?0?01[02]?????01?0010[01]?0?????????00  
00110?01?01001111??110?0???2120111000?01100?011300000000?0?11010?1?12000102[01]1  
[01]0010[01]000000100?1[12]10102??01?00?????????????0??????????00??1?001??000110000  
[01]???10111001???002200010210100201020111000011110

Miacis

001000210000000000000?01010?1?0111?0000123000101??000100000120220020210022210  
11102111100?221001[02][01]01001100110010011111023100001[01]?10100?10000?0????111  
1???1?1[123]1????10012?10?10????????????????20???0??????10?1000000110000?10?010010  
?111111?101011?21[23]0111000?011000111[13]00000000?0111010?1?1200011111000??000  
00010101[12]10002??01?00?????????????0?????????0010????10?000????0?00?????1?????0  
00?????????1?1?0?????????1??00111?0

Gujaratia

00100021?0000?0400000001110?1?2001?20012001100011??000201001111120020210022221  
111021111221221022230000100000?02101112222120001002[12]010011000000300001[01]20  
00?????1110111010?0011010101100??????1103?03000000??00200100111000010000000001  
1111??1?1010021200?1000101100??1300000000????1?1??1??0?01?????????????02?????1?1  
1[01]0102?01000?????????2??30?????????1??010????10011??11?010101??111?12100012210010  
201201101012101100000000

Hyopsodus

0013002101000000000000011110?102110?10012001100010??0[01]12211001111200202100222  
21111021120220221012232[01]00110[01]0000210111222221000100[012]2010111010000[02]  
01001110?01?1211110111000011110001011?012000[012]00103?0000000000??00?000??02??  
011?0?111001111011101010021201?10002011000101100100000?0?1101011?100101002[01]?  
002??00100200101[12]101?10???1?00?00201?11???0???111?0?1?02001011100011111010101  
100?100210000121001021120020101110100001?1?0

Meniscotherium

001100210040000400000011110?102001?20012201110011??000221100112120020111022221  
11112122020122101223210011000000110111222031?0000002110121000000001001120011?1  
21111011[12]0100[01]011000101100121?0[01]02000000?0000001?0001000??000001100?210  
0011110??101010?[12]12011100?2011000101300100000?011101011?10010000110002??0?0  
0210101[12]0?111????1?00?0??1??1??0?01111011100201111100101111101010111110021  
0000120000021000020101111120000?0?0

Phenacodus

001000211040000400000001110?1?2010?210?2201110?11??0[012]0221[12]001[01]11200201  
1102222211112122022022102223210011000100210111222211000100020100[01]1000?00001  
001120?0????111011[12]0000?01100010110012100220?03?00000[01]0000?00000001012??0  
11?0021??011110????1010?212011100?2011000101300100??002[12]1101011?10010000?1??0  
2??10?002100?12100[01]10??1?00?0?????100[03]0?01111??10020111?1001011111010101  
011110121000022?001021?00020101?112?000000?0

Ptilocercus

0020003110000021100010101110200000?10011020100????000221001100122020210022122  
11100110100?2211112201001000000011021312231200010031010011200000200001020001?1  
31112001011200011110110100100000001110000001111110010001100011101002011101110  
11101010021201010000011001101111000010?111110211?1210100211100[01]111000020010  
120110010101100100211112??30101111?11[01]10101101000000110000001100001001100002  
210110210200101121111001111111

Plesiadapis

00[23][01]1033013000101020-0[12]12--?[23]?20[01]0-2[01]012[12]011[01]0-----  
0000[01]1[12]0011122[01]02021[01]02222[12]1110211012202210222320001  
[01]00110021021312210200010032100021200000200011011201-13111  
201120020111101010010000000000113-01000000110?10??01?02-001  
0?01?120001111?1112?20011200-11002011100101100002000-211110211-  
121000031??[02]02?211111200201[12]11100?10110001??????2--  
30111111?1??00101?000000001100000?1100[01]01001?0?00220011011000020111111101111  
1111

Notharctus

0010003200400004000000010100102011?20002[12]01100010??0[01]02211001112210202100  
222211110211012212210122320001101????10212222102000100121[01]00[12]12000002000  
01021[01]11?13111101100011101100010011010000000113?0000001001?0001?1??0001110?  
0?[01]120001110?11110200?1200?1100?011000001100002010?111110211?12101003111?0[0  
1]11?1111200201[12]1110010011000????11?2??30?11111??00010??0?00100011000010110  
0001002100002210100210?11101122112211111111



Adapis

0013003200400004000000[01]11100102010?[12]0002201100010??00022110011122[01]02021  
002222[12]1110211012002210122320001001????10212222002?001001210001100000030010  
1021[01]11?13111101[01][01]0021101100010011010000010113?00000[01]0001100011011?00  
01110?010120001110?1101020011210?11001011000001100002010?111110211?1210100311?  
?0[01]11?1111200201[12]111001001100010??0???2??30?????????????????????0??10?00??11  
??????2????022101002100111011221112111111?1

Tribosphenomys

0032114301221?121131?02?2??3?2????0002?????????????0210?0101220020210022222111  
22?101220221022031?001111????21313122102010001?2100?102100?02??0??10101?131?1?  
??1110????????????????????????????????10????1????????????????????????????????????  
????????????????????????????????????????????????????????????????????????????????  
????????????????????????????????????????????????????????????????????????????????  
????????????????????????????????????????????????????????????????000221001011020020101111?0??????

Paramys

0032114301221?121131?02?2??[23]?2????00022201110?????????0211?0101[01]33?????1??22  
2211?22?22?2202210222320001111?????2131322210101000[01]32100110210000[02]??01022  
0101?1311120?1110200011000111110?0100002113?0200000001??3011001?02??01010000100  
0111011102020020201110212001200001300010000?01110001?101000001200001110100210  
0?11111020?001000?0?????2??0?011110??00010??0?0000[01]011?10?00?112111002100002  
200010110200201011112100000000

Rhombomylus

0032114301221?121131?02?2??3?2????2[01]0?2[01]10200?????011220200111233?????0??02  
1201?22?20100?221022032?1?1111?????110131211120000003[12]1000112100002100000201  
01?1211120?1110200011000111110?0100002003?010000101110101100100000110101212000  
11111111202002120[01]010212001100002[13]000102??211110[12]11?12100103120202?2?0  
1002000?1210[01]0202111000000201012??201??1??1??0?1?1?0110000111010?????11011101  
2100002210010110200211011101200000000

Gomphos

00[23]21132012110121131102?2??[23]?2????210?2100000?????022021200101233?????1??0  
22211?22?201020221022032?0?1111?????1131312210201000032100011210000210010020101  
?1211120?111010001?01??11110??100?02003?0100001011?010?00??02??01??0?0??01111  
?1101010??1201?1031100120000210?0002??????1?????????????????????????????????1??0?0  
2101000?????????????30??111?????000110?001?011?????????10?111?1?1000022000102102011  
1101111100???????

Mimotona

00[23]21132012110121131102?2??[23]?2????20002000000?????000021000101233?????[01]?  
?022211?22?20100?221022032?0?1011?????11?131221020000003?1?????10??????????01??  
?????11[12]0?1110?????1??01?1?????1?????????000000?1????????????????????????????  
????????????????????????????????????????????????????????????????????????????????  
????????????????????????????????????????????????????????????????????????????????  
?????

Blarina

00[23]3002[23]11201[01]1110310011[12]?1?[23]?0????10021200201????000222?001001100  
200110202221110100100?121101022?1111000110111213112332000011?3010020000000000  
101110101?1311110112011110111101101?0?0?020110100011???21?00?1????102???12?00?  
1000011111101010021[23]00?1100??10???111300001000?011110031?120000001101000100  
0002112012101000100100100?101012??00?01111001[01]000010011000001100000111001010  
01100102200011210000201011101?10000100

Erinaceus

00[23]0002211000[01]10100010101110[23]00????[01]00[01]1000100????0002200001001200  
202100022211?02100100?22010223201111000100211213122032?0011[01]3[23]0101210000  
00300101020101?131112001001111111111?01101200100111100100101111?0101110[01]002  
??010010002000111111101010021200?104020111?1100111001000?011110011?10101002100  
00011001000111012101020100[01]000100201?1110[23]0101111101100101101100110110000  
111102011001100102210110111201201010101100000000

Solenodon

002300210130012000000010110?2?1000?10011020100????00012000010020002020012213??  
1120111100?120100011?0010000000201001000030?0000013010021100000301111010101?13  
1111011[02]11111111101111001200001111100001???211101011100002???10000000001111  
10110100?02120111100?0110?1211300000000?011110011?1100000011000111001002112012  
110000110100110??????2??301011101011102011010100001101010011001010011000022100  
10211?0020101010211??10110

Eoryctes

002?00?[23]?????????0????01??2?1????10011220001????0001000?0100220020210022[01]  
0101102112000?120?0100?0?100000?02000110203?20000?0[23]2????????????????????010??  
????????1001???0?10?11?110????0?2210100?0????2??????00?0??2???10?00?00?001111?11  
??0???2120111100?0110?1[12]0111101?010?1?1110????1210100211000[01]1100100011101?1  
000?01?01?????????????0????????????????????????????????????????????????????????  
???????????????????

Potamogale

0023002101200023000010101100202000?20012210000????110120011100211020221022120  
01100111100?22000100?0010000000211111020032?00000130100200000000000001010201?1  
31111011210111011111??111?1000032100000001???210?00100001002???1001101101011110  
110100?02120111100?0110?0211211101000?011100011?110000111101011100100010201210  
100011010011002011110000101111101110001010110110110000011110010?02100101200?11  
110201??1?00102?0000?010

Orycteropus

01[23]???54????????????22??[23]?2?????0?????0?????????0?10?0?????????????  
????????????????????????????????????????????????????????????100[123]010110010000300101020201?1311  
001?[01]201011111010010120?200040110101000000100000100000100000101000000001110  
0110100?021200?10412010?0201100020000?011101011?1000000011100110101002100?111  
110001101000102202?12??[123]01?11110?000201101111001110001010101111102?1101220  
10111100002?101?112????????0

Rhynchocyon

00210051?????103100011001000102001?12011220201001??11[01]221200222033?????0?021  
211?02?10100?22101100?0?1??000011103122220?2?000?012011100000000300101020201?1  
311100110011011110100111001200002101001000010100000100000100100101110200001121  
01101011021200?104020010101011110?1010?111100031?101010011202?011?0???10?201[12  
]?10000111101100211112??20101111101000101111110101110001010100111012111112211  
011211201221010102010000000

Procavia

00121[01]4201221?031000102?2???1?2020?22032201200000??121221100102033?????1??021  
211?12?12300?22101123202310100001011111122032?0100001111120010000301101020211?  
1211111?1110001111000101100?2000[01]0[01][01]1001[01]00000001101011000[01]0010110  
101200010112111101011021211010410010??02011001001?00211110011?10000000120002?2  
100002000?021010102111100102100112??01101111001100201120100111111001010101111[  
01]12101102201111101201221030102200000000

Moeritherium

00211[01]2202000102100010112???2?2???22012201100?????121221110111033?????0?022  
211?02?02300?2210122321001011?????11214222102001001?1101131010100001001020011?1  
??1110111?0100011001?????000001[01]1100002001010?1?1?001101002??010?01000100111  
001101000011?11010400000?0001?00????????????01?????????????????????0?02??????102?0  
???01?0???0?12?0???1?0111100?11020112011011011????????00110001?????????????????  
???????????????????

Chaetophractus

01130054?????0????????1111????????????????????????????????????????????????????????  
????????????????????????????????????????????????????????????000000120010100300101120201?131110111?101  
00101010100100100103?100200?00000001101011001102??01020012010011111110200?1212  
00?10312011112011000101?01211110121?11000001221002?2001002000?110111002111100  
100200010100010111101111121110010100011000101110110100210110220000011020020101  
110010???????

Bradypus

0133??54????????????112?????????????????????????????????????????????????????????????????  
????????????????????????????????????????????????????????????????00310012001010000001021211?131100102??01  
1[01]011000110100020003?000200?00000201100011001102??01020100010011201110200?02  
1[23]00?11002010??00011000001?01201110021?11000011121002?2001002000?1200[01]0002  
101110100102?11010010111101011121101000001011000001111201000210000320001010020  
1121010010000011110

Tamandua

1?????????????????????????????????????????????????????????????????????????????????????????  
????????????????????????????????????????????????????????????????1?00?0?000?0100000111020201?13111?1?1?01101  
111010110[01]00?20003?10020??001002?0000000000102??0102010201001120?111200?0212  
00?11002010??0100100000000?211110??1?1?0000??????2?2?0?002000?12101100210110010  
020101[12]0100?011110011112110000010001100010111100100021000022001101002002210  
10110001110110

Dilambdogale

002????????????????????????1??2?0??????01000000??????0120100100[12]1100000112211000  
1101101[01]2022001200??001100010010[01]3110111010000[01]02301?????0??????????????  
??????????100????????????????????????????????????????????????????????????????????????????  
????????????????????????????????????????????????????????????????????????????????????  
????????????????????????????????????????????????????????????????????????????????????  
????????????????????????????????????????????????????????????????????????????????????  
????????????????????????????????????????????????????????????????????????????????????  
????????????????????????????????????????????????????????????????????????????????????  
????

Widanelfarasia

002?00?1????????????????01??2?0000?00101000000?????000120100100211000100?22100001  
1011010202210200??0011000100[12]0131101110100000??01012?100?0000100100??01?1??  
?????100????????????????????????????????????00????????????????????????????????????????  
????????????????????????????????????????????????????????????????????????????????????  
????????????????????????????????????????????????????????????????????????????????????  
????????????????????????????????????????????????????????????????????????????????????

Todralestes

002????????????????????????20????????01000000-----  
00022000?100220010000022201001011112[02]201200122100001100010011031[12]11110[12]  
00000033010?[23]?200??000?10?01??01?13?????100????????????????????????????????????  
????????????????????????????????????????????????????????????????????????????????????  
????????????????????????????????????????????????????????????????????????????????????  
????????????????????????????????????????????????????????????????????????????????????  
????????????????????????????????????????????????????????????????000011??????????????  
????????????????????????????????????????????00101??

Microgale

0021002111100020000010010100200000-10010000000-----00012001?11020200010012203 --  
012--1--000210000000-00110001001013010000300000013-010130000000000001000201-  
1211110011100110101101101?00100020010000001---211?01111101002-00102100110001  
111111101112121101100-011001012201100000-011100011-1000001-210111-1001012?1  
2011101000000100010?21001??0010111?101100?010011[01]000[01]110000011110111?0?10  
011220011011[01]200211100010[12]00110010

**Foxomomys fremdi**

002?0?3?????11?2?-???111?2?0???-00011221100-----  
000000[01]0111022[01]02021002222[12]11102110112112112222000011000100100113122112  
0001002200?0??200000?????????31????????????????????????????????????????  
????????????????????????????????????????????????????????????????????????  
????????????????????????????????????????????????????????????????????????  
????????????????????????????????????????????????????????????????????????  
????????????????????????????????????????????????????????????????????????

**Dryomomys szalayi**

00210033013000111020-0?0111?2?0000-20112221101-----  
000000101111221020210022221111021101221221122220000110000001101131221020001003  
2000011200000200011021101-  
1311110111110????1?00?0?1?????0?2?????000?01??????????2-  
0?????????0??1?????????????????1100?01110?1?????????010-0111102?1-  
12?0?0?????????????01?00201?????10??1?0?????????????????????????01???000000????00  
0???0000?01?0?00220011011020020111211100?????11

**Tinimomys graybulliensis**

00310033013000111030-0?0111?[23]?0000-2[01]012221101-----  
000[01]00101111221020210022221111021101221221122221100110001001101131221020001  
0032000011200000200011021101-  
1311???11111?????????????????????????????????000?????1?????????????????????????0????????????  
?????????????????????????????????010-0111102?1-  
12?0?0?????????????01?00201???1?????????????????????????????????0????000000110000  
001100001001?00002200110110200201112111001111111

**Carpolestes simpsoni**

00[23]-0022013000111020102-111?[23]?0010-21112200011-----00---  
011122102021002222111102110122122111222100010001100210113122102000101321000112  
00000200011011201-131111011011201011010100110-?001?00103-00000010111100?00?02-  
0010?0?020?0?1?1?11?20200112?0-1100201100110?11?002000-0111102?1-  
12?0?0?31?????????01200201?01100?????0?0?0?????????2--  
?0?111?????????0?0????00100011000?0?1100001001?0?002200110110200201111111011111111

**Cynocephalus**

0033003112[13]000241000101010003-2020-02012200010-----  
00102121110222102021002222[12]111101101220221122000-  
001000010021031322230200001002110111100000201001111211-  
13111111110000101111001110012000002113-  
00000000100100100011000011010002111011101111111021300-10000010--0011100000----  
2-1110011-1110001012020---1?-01000101201100021111001??211112--  
00111111??0[01]002111010000011100001011000110011000022001102102002011111110001  
11011

;



Microsyopidae

111102011101101001[12]00011001000001011012010101000101000111101010010010111001  
12001010?0?001001100100000??1000001010001?1?111?????????????????????0?0??????  
????????????????

Micromomyidae

111101012101001021[12]0000220100000011100000000010[01][01]001011110101[01]01000  
110100012000001?1?00?1001?????0?????000101010001100111100000?210[01]011001111012  
0010010011101001110?0011011?

Atliatlasius\_koulchii

?????????????0?????????0?????????????????????0102000010011??00101??0010000[12][01]  
0101????????????????????????????????????????????????????????????????????????????  
????????

Altanius\_orlovi

10?01?????0100000012001101100000010?0?0?????110000121000100111210110111100110200  
101????????????????????????????????????????????????????????????????????????????  
????????

Omomyidae

10101101101[01]101101[12]00[01]110000000010111020021011001120000100110[12]001[01]  
01111100002001011001111120001010?12?1100101010001110111??????1?010101101110101  
00002??0??3?2100?0?????1?2?1

Adapidae

10101000001000000[01]1[01][01][01]10000000000100021001011001[01]2000010011010011  
[01]1111000[01]1[12]1010110011111210[01]100[01]112?11001010100011101110000001011  
011111111010100002000103021000000??010211

Elpidophorus

?001030?????10?3[01]13[01]011[02]11000301111001?1?000011[01]011010201001111210001  
0000111201110????????????????????????????????????????????????????????????????  
????????????????

Plagiomene

0001030??0?0100311310112110203010100001100000111012000201001111200011000010121  
11101?1?101?0?10210?0?????0????????????????????????????????????????????????  
???????????

Cynocephalidae

020003000001[02]0121131[01]11200100301111[01]1001??00011102200120100110000000000  
002000011000210201001111010100102010001100111[01]01011111111021200110111200121  
1010111012110111111111121100

Ptilocercus\_lowii

0200000100011110301[02]01120000000010111[01]2???10101001100020000000101001000?1  
211110101010110100201010100010000100100000111011001001001000121001111012010000  
0010101001111111110100

Tupaia\_glis

0200000100111010301[02]011200[01]0000010111000??10100002100020000100101001000?1  
211001010020110100201011110121010100000001000000000001000000020000000000000000  
0100[01]000100000000000000

Berruvius

?0?1010??1???0??01[02]0001100???20??11?00?1?00010000010[01]001[01]101011010010111  
0011200100????????????????????????????????????????????????????????????????????????  
????????????????

;



**Table S10.** Modified character matrix of (24) in TNT format. See (24) for character descriptions and states. All modifications in bold.

xread 'Purgatorius analysis modified Silcox 2010'  
240 34

Ukhaatherium

10100010000000000000?00?100110010000000020020000?1001?000101000?000000110?021  
0?11100?101??021?00110?0000?00000000000010002002100101020001000001100000000102  
?00011100011000020010000000010101000000002010001200200110000001000000000200000  
000000

Leptictidae

?01100010000100000?1??210?211011100110011000010102000000001?10000?101221001100  
020101000101001110100101100?02200110?0?011002002101021020002010000030000000100  
0010001001100000001100000000100010200000120[01]10000000001100000?0000000000300  
000000000

Erinaceus

20010110200021001100000100101000100102?002001211010011?00010000000201121000110  
021100101100012100011101000?00100011000011101020010100021000111111101011011000  
11110011300011001011100000000010110012?11200121131111010100011???2000020002000  
200000

Echinosorex

210101112000?10012000011002110011001??0102000211000011000010000000100121000010  
0201001011000110000110?1000?00100011000010101002100101021001111001101011011100  
11110011300011011010011000000010000001001200001032110010100011???2000000002000  
200000

Hemiechinus

210110102000210000????0110100000100112?????????????????????0????01020102100012012[  
01]100101110012100011101000?00100011000011102002000101021001111101101011011100  
111100112?0011011011101000000010110012?112000010321100102000110000000020002000  
300000

Otteryctes

????????????????????????????????????????????????????????0?????????????????021[01]00??2?0?010  
100011?0011011111011110021001100??01011210210110002000101100010000000000000011  
110101100002001000000002000000011000210000120020011000020000000010021100000000  
0

Pararyctes

????????????????????????1????????110?????????????????????????????02?000??1?020?0?0?  
?11?011?0111101?00?0210?10?????0111012000100020002011001100000000100000010102  
?1101000001000000003??0100110112000000200200110000200000000101111000000000



'Tupaia\_glis'

100100010000000000100021022100110000001000002201020100000100100002?00222101120  
0200000000110011101010?111110210001100002101200210000[01]020001011101000011101  
112?00201102?00010000110001300010100000110012301[02]0130100010000011102000000  
001010300000

Genetta

2010001100001000011000110210100100100001120001110200000000001000030122100101[  
01]0100010[01]01011020000100?1002?020010100000100020021001010200120110011010100  
01000?001010?2?00000021?1??000000100010010000020012113112001000000??2011??00  
2000000000

'Cynocephalus\_volans'

101000100010011100101000110000000000000001002000021001100100102110311211101120  
0211000000010002?10200?1022?01011010000020110?02111000021002011110031000000112  
?1020100000100012000000030001?10001010?012101100001100100100101120000010002000  
301000

Gypsonictops

????????????????????????????????????????????????????????????????????????????  
????????????????????????????????????????????????????????????????????????????  
000200100000?????????0?000012101000[01]000101110001???00000000201010000000

'Carcinella\_sigei'

????????????????????????????????????????????????????????????????????????????  
111??1??001?01001?  
010?01?0000?1?00000?0?20??1??02121113?????????110000110010011?1000102?01001112?  
10010000?100000????????????????????????????????????????????????????????????0000?

'Labidolemur\_kayi'

101100010000000001002021121100110000000110002100120000000?00100002201011?1000?  
100?00100001011000001101000?0?00000111002121113?????????20000011001101000001102?  
01001001100010000010000000102102122111111310110211011111001100001000002110103  
00000

Apatemys

?01?00?10?00??0?0??201?20??01?0000000??00????12?0??000?001?0??01??0?1?00?????  
?????????1??00??0??2??0?111002121113?????????20?0000110000??0?00110000100111  
11000100000100000001021021221112?[02]310??03110111101001?0000100101411010300000

'Heterohyus\_nanus'

?0?00??0??0?0?0020?1?2?????00000001100??10?????0??000?001?0?0??02??1?1?00?????  
??1??????1?????????????????2??011?002121113?????????01100?010000?10?0001102?0100111  
10010100100101100001021021221112?03??????11011110100100000100111112111300100



'Altanius\_orlovi'

????????????????????????????????????????????????????????????????????????????????????????  
????????????????????????????????????????????????????????????????002?0210000102000?011001000111?001000111010000010  
111201000100??01?0?1100000012001000101010100110110000000112102010200000

Adapidae

?01000011011000000002121122?0201000000000000200102110111100110000?102122000111  
0210000000110021101011111111010?0100000[12]1002000100101021001011011000011100  
10[01]0110010100000[01]11201000100000100011000000120[01]1[01][01][01]3110101001101  
00001000101102010[02]00[01]00

Omomyidae

?01100011?11000??????????1112111000000001002200021101??1??1?????????2?220?0121021  
?000?011??021101?1111111?10?0?0?[01][01]100[12]1001001110001021000011[01][01]10000  
11100100011001000[01]010[01]1120[01]0001000001[01]0011000100120010001110101001[01  
]010000000010[12]302[01]10200000

;
